31

32 **ABSTRACT**

33 Nitrate is a major nutrient and osmoticum for plants. To deal with its fluctuating  
34 availability in soils, plants store it into vacuoles. AtCLCa, a  $2\text{NO}_3^-/\text{H}^+$  exchanger  
35 localized on the vacuole ensures this storage process. It belongs to the CLC family that  
36 includes exchangers and channels. A mutation in a glutamate residue conserved across  
37 CLC exchangers is likely responsible for the conversion of exchangers to channels.  
38 Here, we show that a *clca* mutant of this residue, E203, behaves as an anion channel in  
39 its native membrane. To investigate its physiological importance, we introduced the  
40 *AtCLCa<sub>E203A</sub>* point mutation in a *clca* KO mutant. We first showed that these  
41 *AtCLCa<sub>E203A</sub>* mutants display a growth deficit linked to water homeostasis disruption.  
42 Additionally, *AtCLCa<sub>E203A</sub>* expression is not able to complement the *clca* defect in  
43 nitrate accumulation and favors higher N-assimilation at the vegetative stage. Further  
44 analyses at post-flowering stages indicated that *AtCLCa<sub>E203A</sub>* results in an increase of  
45 N uptake allocation to seeds, leading to a higher nitrogen use efficiency compared to  
46 wild-type. Altogether, these results point out the critical function of the AtCLCa  
47 exchanger on the vacuole for plant metabolism and development.

48

49

50

## 51 INTRODUCTION

52 As sessile organisms, plants are facing frequent environmental fluctuations that constitute a  
53 challenge for their survival, growth and reproduction. Fluctuation in nutrient availability is  
54 one of the major factors limiting plant growth. Among those nutrients, nitrate is the major  
55 form of inorganic nitrogen taken up by plants in aerobic soil. As a critical nutrient for plant  
56 development, it is applied extensively in agriculture to sustain yields. However, because soil  
57 clay-humus complexes retain nitrate weakly, it is easily leached thereby leading to severe  
58 environmental pollution (Strahm and Harrison, 2006). One of the current challenges of plant  
59 breeding is therefore to generate crop varieties with improved nitrogen use efficiency (NUE)  
60 to reduce excessive effluents in river and underground water.

61 Nitrate is absorbed by the roots and translocated to the shoot (Dechorgnat et al., 2011;  
62 Cookson et al., 2005). Once inside the cells, its assimilation occurs through the combined  
63 actions of different enzymes: nitrate reductase (NR) converts the nitrate into nitrite that is  
64 reduced into ammonium by nitrite reductase (NiR). The synthesized ammonium is then  
65 incorporated into amino acids through the glutamine synthetase/glutamate synthase  
66 (GS/GOGAT) cycle. At the cellular level, plants are able to adjust their cytosolic nitrate  
67 concentrations between 1 and 6 mM according to nitrate availability in the environment  
68 (Miller and Smith, 2008; Cookson et al., 2005; Demes et al., 2020). The regulation of nitrate  
69 assimilation is essential to achieve such homeostasis. In parallel, the vacuolar compartment  
70 also plays a key role in the fine-tuning of cytosolic nitrate concentrations. When the external  
71 concentrations of nitrate are high, plants store it in their vacuole from which it can be  
72 remobilized when demand increases, as during a starvation period (Miller and Smith, 2008;  
73 Martinoia et al., 1981). To accumulate nitrate at high concentrations in the vacuole, the  
74 presence of an active transport is required (Miller and Smith, 1992). It was early suggested  
75 that this transport is mediated by an antiporter energized by vacuolar proton pumps generating  
76 pH gradient through the vacuolar membrane (Schumaker and Sze, 1987). Such a vacuole  
77 localized  $2\text{NO}_3^-/\text{H}^+$  exchanger called AtCLCa was characterized by electrophysiological  
78 measurements on *Arabidopsis thaliana* isolated vacuoles (De Angeli et al., 2006). A knock-  
79 out for AtCLCa (*clca-2*) displays a decrease by up to 50% of the endogenous nitrate content,  
80 supporting its major role for nitrate storage in the vacuole (De Angeli et al., 2006).

81 Consequently, the reduction of AtCLCa activity in this mutant leads to an increase in nitrate  
82 assimilation and a change in root nitrate influx to adjust cytosolic nitrate homeostasis  
83 (Monachello et al., 2009; Liao et al., 2018).

84 It is assumed that nitrate in the vacuole does not only ensure nitrate homeostasis and proper  
85 plant growth under starvation but also plays a role as an osmoticum involved in plant water  
86 homeostasis (McIntyre, 1997). Genetic approaches support this hypothesis as QTLs for nitrate  
87 and water contents in non-limiting nitrogen conditions co-localize (Loudet et al., 2003). The  
88 *AtCLCa* gene is highly expressed in mesophyll cells and stomata. **In the *clca-2* KO mutant,**  
89 **stomata opening in response to light and closure to abscisic acid (ABA) are impaired**  
90 **suggesting that *AtCLCa* is involved in anion translocation through the vacuolar membrane in**  
91 **both directions depending of the environmental conditions. Consequently the *clca-2* mutant is**  
92 **highly sensitive to hydric stress compared to wild-type plants (Wege et al., 2014), supporting**  
93 **a central function of *AtCLCa* in the control of water content regulation.**

94 *AtCLCa* is a member of a highly conserved protein family widespread from prokaryotes to  
95 mammals (Mindell and Maduke, 2001). **Although most CLCs are more selective for chloride,**  
96 ***AtCLCa* transports mainly nitrate as its selectivity motif contains a proline instead of the**  
97 **serine found in other characterized CLC exchangers (De Angeli et al., 2006; Wege et al.,**  
98 **2010). Additionally,** despite their close structural similarity, CLC members can be either  
99 anion channels or anion/proton exchangers. In humans, five CLCs are chloride/proton  
100 exchangers (HsCLC3 to 7) whereas the four others are chloride channels (HsCLC1, HsCLC2,  
101 HsCLCKa, HsCLCKb) (Poroca et al., 2017). Interestingly, most of the exchangers share a  
102 highly conserved glutamate residue (E203 in *AtCLCa*), the “gating glutamate”. This residue,  
103 initially identified in CLC-ec1 from *E.coli* (Dutzler et al., 2002), is located in CLCs’  
104 selectivity filter and projects its side chain in the ion pathway. When deprotonated, this  
105 residue blocks anion transport but, upon protonation, it moves out of the pathway thereby  
106 allowing anion access (Dutzler et al., 2003; Park et al., 2017). During a  
107 protonation/deprotonation cycle of this residue, two anions can be transported by the  
108 exchanger. The mutation of this glutamate in a non-protonable residue in bacteria (CLC-ec1),  
109 human (CLC-3, CLC-5 and CLC-7) (Costa et al., 2012; Weinert et al., 2010; Novarino et al.,  
110 2010; Weinert et al., 2020) and plant CLCs (*AtCLCa*) (Bergsdorf et al., 2009) uncouples  
111 anion transport from the proton transport and converts the exchanger into a channel.

112 In mammals, both CLC exchangers and channels coexist (Poroca et al., 2017). Interestingly,  
113 CLC transporters are all localized in intra-cellular compartments whereas, CLC channels are  
114 restricted to the plasma membrane. In Arabidopsis, all CLCs are localized in intracellular  
115 compartments and, so far, no CLC channel has been identified. In addition to AtCLCa, three  
116 other CLCs are located in the vacuolar membrane in *A. thaliana*. Among them, AtCLCb, the  
117 closest homologue of AtCLCa, is also a  $2\text{NO}_3^-/\text{H}^+$  exchanger (Lv et al., 2009; von der Fecht-  
118 Bartenbach et al., 2010). Nevertheless, knock-out mutants for *AtCLCb* contain as much nitrate  
119 as the wild-type genotype suggesting that loss of AtCLCb is compensated by AtCLCa (von  
120 der Fecht-Bartenbach et al., 2010). The other vacuolar CLCs in Arabidopsis, AtCLCc and  
121 AtCLCg, are involved in chloride transport, as the knock-out mutants are more sensitive to  
122 NaCl stress, but their electrophysiological properties are unknown to date (Jossier et al., 2010;  
123 Nguyen et al., 2016).

124 AtCLCa is thus an essential transporter for nitrate storage in the vacuole and the control of  
125 water content. As an exchanger mechanism was demonstrated for AtCLCa, we wondered if  
126 nitrate and proton transport coupling is absolutely required for plants to stabilize water and  
127 nitrate status. We investigated this question by analyzing the physiological consequences of a  
128 conversion of the AtCLCa exchanger into a channel. We mutated the gating glutamate of  
129 AtCLCa into an alanine, a non-protonable residue (E203A), and introduced it in a knock-out  
130 *clca* background to analyze the phenotype of the generated plants for water content and  
131 nitrogen use efficiency. The physiological consequences of such a mutation should provide  
132 insight on the significance of having an exchanger rather than a channel activity for AtCLCa.

133

134

## 135 **RESULTS**

### 136 **Expression of AtCLCa with a gating glutamate mutation in *clca* KO plants**

137 To analyze the physiological consequences of the E203A mutation in AtCLCa, *AtCLCa<sub>E203A</sub>*  
138 under the control of the 35S promoter or the AtCLCa native promoter was introduced in *clca*-  
139 2 knockout mutant (De Angeli et al., 2006). As a positive control, we used the complemented  
140 line, *clca-2/35S:AtCLCa*, already characterized in previous studies (Wege et al., 2010, 2014)  
141 and two control lines *clca-2/pAtCLCa:AtCLCa* generated in this study. The *clca*-  
142 *2/35S:AtCLCa<sub>E203A</sub>* 3 and 8 lines were selected because they overexpress AtCLCa as strongly

143 as *clca-2/35S:AtCLCa* complemented plants (20 to 40 fold relative to WT), whereas *clca-*  
144 *2/pAtCLCa:AtCLCa<sub>E203A</sub>* 1 and 4 lines and the *clca-2/pAtCLCa:AtCLCa* 6 and 2 lines were  
145 selected as they display an expression level 0.5 to 2 fold compared to native *CLCa* in Ws-2  
146 (Supplemental Figure S1A). In parallel, we checked that the mutation in *AtCLCa* does not  
147 change the sub-cellular localization of the protein by transforming *clca-2* mutant with *clca-*  
148 *2/35S:GFP-AtCLCa<sub>E203A</sub>*. The fluorescence was observed on plants from two different  
149 independent lines in guard cells and apical root cells (Supplemental Figure S1B). As  
150 expected, the mutated form of *AtCLCa* is localized in the vacuolar membrane in both cell  
151 types.

152

### 153 ***AtCLCa<sub>E203A</sub>* shows reduced proton/anion coupling**

154 A previous report showed that in *Xenopus* oocytes the “gating glutamate” mutation E203A in  
155 *AtCLCa* exchanger disrupts  $\text{NO}_3^-/\text{H}^+$  coupling (Bergsdorf et al., 2009). Therefore, to quantify  
156 the changes in the vacuolar anion transport induced by the E203A mutation in *AtCLCa*, we  
157 investigated the properties of the ion currents across mesophyll vacuolar membranes from the  
158 *clca-2/35S:AtCLCa<sub>E203A</sub>* L3 and L8 lines (Figure 1). We applied the patch-clamp technique to  
159 vacuoles from these two genotypes as well as *clca-2/35S:AtCLCa*, Ws-2 and *clca-2* knock out  
160 mutant in the whole-vacuole configuration. In order to measure anionic currents only, we used  
161 the non-permeable cation BisTrisPropane as a counter ion. We found that *clca-*  
162 *2/35S:AtCLCa<sub>E203A</sub>* L3 and L8 lines had similar behavior (Figure 1A compared to  
163 Supplemental Figure S2A), thus for detailed characterization we focused on *clca-*  
164 *2/35S:AtCLCa<sub>E203A</sub>* L3 line. In order to evaluate the impact of the E203A mutation on the  
165  $\text{H}^+/\text{NO}_3^-$  coupling of *AtCLCa* and the intensity of  $\text{NO}_3^-$  currents across the tonoplast of the  
166 different transgenic lines, we used the experimental design schematized in Figure 1A. First,  
167 we exposed vacuoles to bi-ionic condition (i.e.  $\text{NO}_3^-$  in the vacuole,  $\text{Cl}^-$  on the cytosolic side)  
168 to measure the vacuolar current densities in the different genotypes. Second, vacuoles were  
169 exposed to  $\text{NO}_3^-$  in the cytosol (i.e. with  $\text{NO}_3^-$  on both sides of the vacuolar membrane) to  
170 allow comparison between the Nernst equilibrium potential for  $\text{NO}_3^-$  ( $E_{\text{Nernst}}^{\text{NO}_3}$ ) and the  
171 measured reversal potential ( $E_{\text{rev}}$ ) (De Angeli et al., 2006). Third, to test the coupling between  
172  $\text{NO}_3^-$  and  $\text{H}^+$  transports, the cytosolic pH was shifted from 7 to 9 in presence of  $\text{NO}_3^-$  at the  
173 cytosolic side to quantify the change in  $E_{\text{rev}}$ . Finally, each vacuole was exposed to the initial  
174 bi-ionic conditions to ensure that it was not damaged by the treatments.

175 As previously shown, in vacuoles from *clca-2* the current density was much lower than in the  
176 wild type *Ws-2* or in *clca-2/35S:AtCLCa*, corresponding to a decrease by  $66 \pm 7\%$  and  $89 \pm 1$   
177  $\%$  at +43 mV under bi-ionic conditions (20 mM Cl<sup>-</sup> pH 7 at the cytosolic side), respectively  
178 (Figure 1A).  $E_{rev}$  in *clca-2* was difficult to quantify due to high variance (Supplemental Figure  
179 S2B) probably resulting from the very low vacuolar current densities measured in this  
180 genotype. Under all tested conditions, the currents mediated by *AtCLCa<sub>E203A</sub>* were twice  
181 higher than in *clca-2*. Notably, in *AtCLCa<sub>E203A</sub>* vacuoles, no activating kinetics of the ion  
182 currents at positive membrane potentials could be observed (Figure 1A), suggesting a link  
183 between activation at positive membrane potential and the exchanger mechanism of *AtCLCa*.  
184 Plotting the measured steady-state current densities ( $I_{ss}$ ) against the applied voltage revealed,  
185 in all ionic conditions, a far more negative reversal potential ( $E_{rev}$ ) for *clca-*  
186 *2/35S:AtCLCa<sub>E203A</sub>* vacuoles compared to *Ws-2*, *clca-2/35S:AtCLCa* and *clca-2* vacuoles  
187 (Figure 1). While the  $E_{rev}$  of *Ws-2* and *35S:AtCLCa* measured when nitrate is in the cytosol  
188 confirmed the previously reported  $2\text{NO}_3^-/1\text{H}^+$  transport stoichiometry (De Angeli et al.,  
189 2006), in *clca-2/35S:AtCLCa<sub>E203A</sub>* vacuoles we observed a reversal potential of  $-68.5 \pm 6.3$   
190 mV that is close to the  $E_{Nernst}^{\text{NO}_3^-} = -75$  mV. The proximity of the  $E_{rev}^{\text{E203A}}$  with  $E_{Nernst}^{\text{NO}_3^-}$   
191 indicates that the coupling of anion and  $\text{H}^+$ -transport is dramatically affected in *AtCLCa<sub>E203A</sub>*.  
192 In the next step, the change of pH from 7 to 9 at the cytosolic side of the vacuolar membrane  
193 confirmed the disruption of the  $\text{H}^+$  coupling in *AtCLCa<sub>E203A</sub>*. The cytosolic pH changes  
194 significantly modified the measured reversal potentials in *Ws-2* ( $E_{rev}^{\text{pH}7} = -27.2 \pm 4$  mV and  
195  $E_{rev}^{\text{pH}9} = -3.7 \pm 10.0$ ) and in *clca-2/35S:AtCLCa* ( $E_{rev}^{\text{pH}7} = -23.7 \pm 2.0$  mV and  $E_{rev}^{\text{pH}9} = -3.4 \pm$   
196  $2.2$  mV). Notably, the  $\Delta E_{rev}$  observed in *Ws-2* ( $\Delta E_{rev} = +23.5 \pm 6.7$  mV) and *clca-*  
197 *2/35S:AtCLCa* ( $\Delta E_{rev} = +20.2 \pm 2.7$  mV) is close to the expected shift for a  $1\text{H}^+/2\text{NO}_3^-$   
198 antiporter. In contrast, in *AtCLCa<sub>E203A</sub>* vacuoles the  $E_{rev}$  after exposure to cytosolic side pH 9  
199 was not significantly affected ( $E_{rev}^{\text{pH}7} = -68.5 \pm 6.3$  mV and  $E_{rev}^{\text{pH}9} = -61.6 \pm 5.7$  mV)  
200 confirming the absence of  $\text{H}^+$  coupling in *AtCLCa<sub>E203A</sub>* mutants (Figure 1B). These data  
201 demonstrate that the expression of *35S:AtCLCa<sub>E203A</sub>* in *clca-2* mutant does not restore  
202  $1\text{H}^+/2\text{NO}_3^-$  antiporter activity in the vacuolar membrane. Further, in *clca-2/35S:AtCLCa<sub>E203A</sub>*  
203 we observed a higher current density compared to *clca-2*. Therefore, from this set of data we  
204 can conclude that the *clca-2/35S:AtCLCa<sub>E203A</sub>* plants express a passive  $\text{NO}_3^-$  selective  
205 transport system in the vacuolar membrane that is absent in *clca-2* and distinct from the  
206  $1\text{H}^+/2\text{NO}_3^-$  antiporter activity detected in the other genotypes.

207

## 208 **Expression of AtCLCaE203A in *clca* mutant does not restore plant growth**

209 Nitrate has been known for decades to be a crucial nutrient for plant growth, notably because  
210 of its involvement in nitrogen metabolism (Brouwer, 1962; Crawford, 1995; Chen et al.,  
211 2004). We therefore analyzed the consequences of the introduction of the mutation  
212 AtCLCa<sub>E203A</sub> on plant growth. After 6 weeks of growth on 4.25 mM NO<sub>3</sub><sup>-</sup> in short day  
213 conditions, the fresh weight of *clca-2* mutant shoot was decreased by 30 ± 5 % compared to  
214 Ws-2 plants (Figure 2B). The introduction of AtCLCa restored the wild-type phenotype  
215 irrespective of whether the endogenous or the 35S promoter was used to drive its expression  
216 (Figure 2 and Supplemental Figure S3A). Surprisingly, not only expression of AtCLCa<sub>E203A</sub>  
217 did not rescue *clca-2* phenotype, but also *clca-2/35S:AtCLCa<sub>E203A</sub>* plants shoot and root fresh  
218 weights were even further decreased by 26 ± 5 % and 29 ± 7 % compared to *clca-2* (Figure  
219 2B). The shoot to root fresh weight ratio was not affected in any of the phenotypes, indicating  
220 that the plants were not nutrient-starved (Castaings et al., 2009; Lawlor et al., 2001). Under  
221 the control of the endogenous promoter, AtCLCa<sub>E203A</sub> expression in *clca-2* did not rescue plant  
222 shoot fresh weight either (Supplemental Figure S3A). However, only one of the two *clca-2*  
223 */pAtCLCa:AtCLCa<sub>E203A</sub>* lines analyzed displayed a statistically significant plant fresh weight  
224 reduction (22 ± 4 %) compared to *clca-2*. In conclusion, AtCLCa<sub>E203A</sub> expression is not able to  
225 rescue the growth deficiency phenotype of *clca-2* in the tested conditions and even  
226 exacerbates it when over-expressed ubiquitously.

227

## 228 **Water homeostasis is disrupted in plants expressing AtCLCaE203A**

229 In order to understand why the E203A form of AtCLCa leads to a decrease in plant growth  
230 when over-expressed, we explored the impact of uncoupling AtCLCa on plant water  
231 homeostasis. Indeed, nitrate is not only an essential nutrient but also a major signaling  
232 molecule and an important osmoticum for plant cells (McIntyre, 1997; Wege et al., 2014).  
233 *AtCLCa* is expressed in both mesophyll and guard cells where it is involved in building up the  
234 osmotic potential required for proper stomata movements (Wege et al., 2014). We first  
235 measured stomata opening in response to light in plants over-expressing AtCLCa<sub>E203A</sub> (Figure  
236 3A). As shown previously, stomata opening is impaired in *clca-2* (Wege et al., 2014). In  
237 plants overexpressing AtCLCa<sub>E203A</sub>, interestingly, we observed two phases: first, the opening  
238 followed the same kinetics as in *clca-2* and, after 120 minutes, in a second phase, the stomata  
239 opening became significantly lower in *clca-2/35S:AtCLCa<sub>E203A</sub>* compared to *clca-2*. Similar



240 results were obtained for the lines with the constructs *pCLCa:AtCLCa<sub>E203A</sub>* (Supplemental  
241 Figure S4A). Therefore, AtCLCa exchanger mechanism is required for efficient stomata  
242 opening in response to light. We also investigated stomata closure induced by ABA on  
243 epidermis peels. As expected, stomata from *clca-2* responded very weakly to this hormone  
244 (Wege et al., 2014). In *clca-2/35S:AtCLCa<sub>E203A</sub>* plants, ABA-induced stomata closure was  
245 reduced to a similar extent as in *clca-2* (Figure 3B, Supplemental Figure S4A). Thus, these  
246 results show that the uncoupled AtCLCa responds very weakly to ABA and affects both  
247 stomata opening and closure. This indicates that the exchanger mechanism is essential for the  
248 control of the ionic and, consequently, water fluxes through the vacuolar membrane, which  
249 are necessary for correct functioning of stomata.

250 To further analyze the consequences of the mutation in AtCLCa on water content in whole  
251 Arabidopsis, plants were grown on well-watered soil under short day conditions. In *clca-2*  
252 mutant, the dry weight and water content were significantly lower compared to Ws-2 (Figure  
253 4A). This phenotype was restored by overexpressing AtCLCa as previously shown (Wege et  
254 al., 2014). However, overexpression of *AtCLCa<sub>E203A</sub>* did not allow rescuing wild-type dry  
255 weight and water content. It even led to a further reduction of the water content compared to  
256 *clca-2* indicating that the coupling of nitrate and proton transport in AtCLCa is required for  
257 water homeostasis. Expression of *AtCLCa<sub>E203A</sub>* under the control of its endogenous promoter  
258 also failed to rescue the wild-type water content (Supplemental Figure S3B). However, only  
259 one line displayed a further decrease of water content compared to *clca-2* thereby indicating  
260 that the overexpression is responsible for the aggravation of the *clca-2* growth phenotype in  
261 *clca-2/35S:AtCLCa<sub>E203A</sub>*.

262 As the importance of water for plant cell growth is well established (Boyer, 1968), we decided  
263 to investigate the effect of expressing the uncoupled version of AtCLCa on cell size. This  
264 latter parameter was determined by flow cytometry on protoplasts produced by enzymatic  
265 digestion of leaves from plants over-expressing *AtCLCa<sub>E203A</sub>*. Chlorophyll detection allowed  
266 us to analyze specifically mesophyll cells and measure the distribution of the relative cell  
267 sizes for each genotype (Figures 4B and 4C). The size of mesophyll cells from both *clca-2*  
268 knock-out mutant was clearly reduced compared to Ws-2. Wild-type cell size was recovered  
269 upon expression of native AtCLCa. In contrast, cells from the *AtCLCa<sub>E203A</sub>* plants were even  
270 smaller than those from *clca-2* by up to  $9.8 \pm 3.7$  % (Figures 4C). The decreased water

271 content observed in plants affected in the gating glutamate of AtCLCa is correlated to a  
272 decrease of relative cell size, which could account for the lower fresh weight of those plants.

273

### 274 **Uncoupling NO<sub>3</sub><sup>-</sup> and H<sup>+</sup> transport in AtCLCa modifies nitrate storage and** 275 **remobilization kinetics**

276 As AtCLCa was previously characterized for its function in nitrate storage (De Angeli et al.,  
277 2006), we analyzed the nitrate accumulation in plants expressing *AtCLCa<sub>E203A</sub>* under the  
278 control of the 35S promoter or the endogenous promoter. In agreement with previous works  
279 (Geelen et al., 2000; Monachello et al., 2009), we observed a decrease of  $37 \pm 4\%$  and  $30 \pm$   
280  $4\%$  of the nitrate content in *clca-2* shoot and root respectively compared to Ws-2 (Figure 5A  
281 and Supplemental Figures S3C). Strikingly, *AtCLCa<sub>E203A</sub>* overexpression in *clca-2* induced a  
282 further decrease in nitrate content in shoots by  $52 \pm 4\%$  compared to *clca-2*, corresponding to  
283 a decrease by  $70 \pm 3\%$  compared to Ws-2. The nitrate content of *clca-2/35S:AtCLCa<sub>E203A</sub>*  
284 root was similar to *clca-2*. Expression of *AtCLCa<sub>E203A</sub>* under the control of its own promoter  
285 did not lead to further reduction of nitrate content compared to *clca-2* (Supplemental Figure  
286 S3C). As AtCLCa can still transport chloride but with a lower selectivity compared to nitrate  
287 (De Angeli et al., 2006), the content of this anion was measured (Figure 5B). In parallel, we  
288 analyzed the concentrations of other major anions and potassium that are not transported by  
289 AtCLCa but could be affected by the nitrate under-accumulation (Figures 5B to 5D). We  
290 found similar levels of these ions in the different genotypes. Nevertheless, *clca-2* displayed an  
291 increase of malate content as previously shown (Geelen et al., 2000). This increase was  
292 enhanced in *clca-2/35S:AtCLCa<sub>E203A</sub>* lines. Altogether, these results show that *AtCLCa<sub>E203A</sub>* is  
293 not able to restore wild-type phenotype for nitrate contents and indicate that uncoupling  
294 nitrate and proton transport in AtCLCa strongly alters nitrate storage into vacuoles.

295 To better understand the phenotypes of the transgenic lines, we measured the kinetics nitrate  
296 accumulation and remobilization in response to nitrate availability which mainly reflects  
297 mainly the fluxes through the vacuolar membrane (Miller and Smith, 2008; Huang et al.,  
298 2012). We decided to focus for the following experiments only on plants overexpressing  
299 *AtCLCa<sub>E203A</sub>* in which nitrate content is particularly low compared to Ws-2 and *clca-2*  
300 whereas, the vacuolar anion currents driven by AtCLCa are nearly as high as in Ws-2. First,  
301 the dynamics of nitrate storage in plants expressing *AtCLCa<sub>E203A</sub>* subjected to nitrate  
302 depletion was analyzed. Plants were grown for 5 weeks in hydroponics on complete Hoagland

303 medium (4.25 mM  $\text{NO}_3^-$ ) and then exposed to nitrogen starvation for 120 hours. The  
304 differences in nitrate content in the various lines at the beginning of the experiment  
305 corresponded to the ones observed in our previous tests (Figures 5A and 6A). In all  
306 genotypes, the kinetics of remobilization was similar during the first 72 hours of starvation  
307 either in the roots and the aerial parts, apart from the root of Ws-2: all plants lost around 0.25  
308 nmol of nitrate per mg of fresh weight per hour (Figure 6A). This led to a complete nitrate  
309 depletion in roots of *clca-2* and *clca-2/35S:AtCLCa<sub>E203A</sub>* lines. Between 72 and 120 hours, the  
310 rates of nitrate remobilization in shoots increased leading to complete depletion of nitrate in  
311 *clca-2/35S:AtCLCa<sub>E203A</sub>* lines. As a control, we measured in parallel the chloride contents in  
312 the same plants (Supplemental Figure S5A). Nitrate starvation led to an increase of Cl<sup>-</sup>  
313 content in the different genotypes and an over-accumulation in roots of *clca-2/35S:AtCLCa<sub>E203A</sub>*  
314 compared to Ws-2 and *clca-2*. Then this experiment indicated that: (1) the plants adjust the deficiency of negative charges linked to the absence of nitrate by stimulating  
315 the absorption of chloride and, (2) the net rate of nitrate remobilization is not affected by the  
316 lack of AtCLCa or the presence of AtCLCa<sub>E203A</sub> on the vacuolar membrane. The time to reach  
317 complete depletion is essentially related to the level of nitrate stored at the beginning of the  
318 experiment in the different genotypes and organs.  
319

320 To investigate the kinetics of nitrate accumulation in the vacuole, plants were nitrogen starved  
321 for ten days leading to nitrate concentrations close to zero in all genotypes, afterwards 4.25  
322 mM nitrate was resupplied to the plants and nitrate accumulation was measured (Figure 6B).  
323 In all genotypes, nitrate content increased when this anion was added to the medium whereas  
324 chloride concentrations decreased showing again a negative correlation between the quantities  
325 of these two anions in planta (Supplemental Figure S5B). Nevertheless, chloride slightly  
326 over-accumulated after 120 hours only in shoots by  $23.5 \pm 1.0$  % in *clca-2/35S:AtCLCa<sub>E203A</sub>*  
327 lines compared to Ws-2 and *clca-2*. In shoots, at the end of the kinetics, a significant  
328 difference in the rate of nitrate accumulation between *clca-2* and *clca-2/35S:AtCLCa<sub>E203A</sub>*  
329 lines was obvious: rates of  $0.65 \text{ nmol NO}_3^- \text{ mg FW}^{-1} \text{ h}^{-1}$  were measured for Ws-2 and *clca-2/35S:AtCLCa*  
330 whereas they were only 0.4 and  $0.25 \text{ NO}_3^- \text{ mg FW}^{-1} \text{ h}^{-1}$  were observed for  
331 *clca-2* and *clca-2/35S:AtCLCa<sub>E203A</sub>* lines. These differences led to lower nitrate accumulation  
332 of  $39.1 \pm 9.7$  % and  $60.5 \pm 8.1$  % compared to wild-type in *clca-2* and the two transgenic lines,  
333 respectively. In roots, the storage rate decreased by up to  $24 \pm 4$  % compared to Ws-2 but was  
334 similar to the one measured in *clca-2*. These results indicate that, the introduction of the

335 uncoupled form of AtCLCa in *clca-2* strongly decreases the rate of nitrate accumulation into  
336 the vacuole explaining the difference of nitrate contents in the different lines.

337

### 338 **AtCLCa<sub>E203A</sub> enhances nitrate assimilation and nitrogen use efficiency**

339 The defect in nitrate storage into the vacuole in the plants expressing AtCLCa<sub>E203A</sub> is likely to  
340 unbalance the cytosolic nitrate homeostasis and to consequently change nitrate assimilation.

341 To test this hypothesis, we measured the activity of nitrate reductase (NR), the first enzyme  
342 involved in nitrate assimilation localized in the cytosol, on four week-old *clca-*  
343 *2/35S:AtCLCa<sub>E203A</sub>* plants in which nitrate storage is the most reduced (Figure 7A). The  
344 analysis was performed three hours after the dark-light transition when the activity is the  
345 highest (Man et al., 1999). The NR activity increased by 4-fold in *clca-2* and 6.5-fold in *clca-*  
346 *2/35S:AtCLCa<sub>E203A</sub>* compared to wild-type. Consequently, the total amount of free amino  
347 acids was higher by up to  $42 \pm 2$  % in the 2 transgenic lines overexpressing AtCLCa<sub>E203A</sub>  
348 (Figure 7B). However, the total amount of free amino acids was not different between *Ws-2*  
349 and *clca-2* KO mutant. Interestingly, asparagine (Asn), serine (Ser), glutamine (Gln) and  
350 glycine (Gly) were significantly accumulated in AtCLCa<sub>E203A</sub> lines while the concentrations of  
351 other amino acids did not change, indicating a modification of amino acid distribution (Figure  
352 7B and Supplemental Figure S6). We wondered whether the increase in free amino acid  
353 concentration induced by uncoupling nitrate and proton transport in AtCLCa affects the  
354 protein content is also affected. No significant difference was observed between the wild-  
355 type, *clca-2* and *clca-2/35S:AtCLCa*. Interestingly, *clca-2/35S:AtCLCa<sub>E203A</sub>* plants displayed  
356 an increase in protein content ( $25 \pm 5$  %) compared to *Ws-2* (Figure 7C). Those results  
357 suggest that inefficient vacuolar nitrate storage due to AtCLCa<sub>E203A</sub> overexpression leads to  
358 increased nitrate assimilation into amino acids and proteins.

359 Based on these findings, we wondered whether nitrogen metabolism is also perturbed by  
360 AtCLCa<sub>E203A</sub> overexpression at later developmental stages. To this aim, we determined the  
361 nitrogen use efficiency (NUE) in the five genotypes used above. The plants were labelled with  
362 <sup>15</sup>N at the grain filling stage. At harvest, no difference in total dry weight between the  
363 genotypes was observed except for the transgenic line *clca-2/35S:CLCa<sub>E203A</sub>* L3.  
364 Nevertheless, dry weight partitioning between rosettes, stems and roots was the same in all  
365 genotypes (Supplemental Figure S7). This result confirms that the alteration of fresh weight  
366 noticed previously between wild-type and transgenic plants at the vegetative stage is mainly

367 due to a change in water status (Figure 4). Nitrogen content analysis allowed us to quantify N  
368 allocation in the aboveground organs. Knock-out *clca-2* mutant retained 18.3 % less N than  
369 Ws-2 in rosettes while its seeds were enriched in N by 5.5 % (Figure 8A). N partition in  
370 rosette leaves was even lower in the two *clca-2/35S:CLCa<sub>E203A</sub>* lines (29.5% and 13.7%  
371 compared to Ws-2 and *clca-2* respectively), which resulted in much higher N partition in  
372 seeds compared to Ws-2 and *clca-2* leading to a higher N concentration in seeds (Figure 8B).  
373 This increase in nitrogen concentration in seeds cannot be explained by a difference in N  
374 remobilization efficiency (NRE) between the source and sink organs. Indeed, the values of  
375 this parameter, corresponding to the partitioning of <sup>15</sup>N in seeds at harvest compared to the  
376 harvest index (<sup>15</sup>NHI/HI; Chardon et al., 2012), were not different among the five genotypes  
377 (Figure 8C). In parallel, we estimated the relative specific absorption ratio (RSA ratio),  
378 corresponding to the ratio between <sup>15</sup>N in seeds at harvest and the N harvest index  
379 (<sup>15</sup>NHI/NHI), indicating the dilution of <sup>15</sup>N in seeds due to the post-flowering uptake  
380 (Chardon et al., 2012). The values showed a decrease between Ws-2 and *clca-2* or *clca-*  
381 *2/35S:AtCLCa<sub>E203A</sub>* (Figure 8D). These differences may account for differences in N  
382 allocation through the different aerial organs of the plants observed previously. Finally, we  
383 estimated NUE for grain production, calculating the ratio between the proportion of nitrogen  
384 allocated to seeds and the harvest index (NHI/HI; Marmagne et al., 2020). In Ws-2, the value  
385 of NUE was  $1.21 \pm 0.18$ . In *clca-2*, it increased to  $1.30 \pm 0.14$  and reached  $1.43 \pm 0.22$  in  
386 *clca-2/35S:CLCa<sub>E203A</sub>* plants (Figure 8D). These results indicate that mutating the gating  
387 glutamate in AtCLCa leads to a higher allocation of N uptake to seeds and consequently to a  
388 better NUE at reproductive stage.

389

## 390 DISCUSSION

391 In eukaryotes, the CLC membrane protein family is formed by both anion/H<sup>+</sup> exchangers and  
392 anion channels. Despite the different transport mode existing in the CLC family the 3D  
393 structure of the two kinds of CLCs is surprisingly close (Jentsch and Pusch, 2018). This  
394 particular feature has been shown to be mainly related to substitution of the “gating  
395 glutamate” in CLC channels. The physiological consequences of the mutations in this residue  
396 have been studied in live animals (Novarino et al., 2010; Weinert et al., 2020). So far, the  
397 effect of mutating the gating glutamate of CLC exchangers have not been investigated in  
398 plants. We used the specific cellular function of AtCLCa in nitrate vacuolar accumulation to

399 investigate the importance of this glutamate residue in plants from the cellular to the whole  
400 organism level. We found that the conversion of AtCLCa from an exchanger to a channel, by  
401 mutating the “gating glutamate” into an alanine, strongly alters *Arabidopsis* nitrate storage  
402 capacity and water homeostasis, leading to reduced plant growth. However, the plants  
403 expressing the mutant version of AtCLCa presented a noteworthy increase in N assimilation  
404 and NUE compared to wild-type plants.

405

#### 406 **The AtCLCa<sub>E203A</sub> mutation leads to a decrease of nitrate storage in cells**

407 Our results demonstrate that mutating the 203 glutamate of AtCLCa on native vacuolar  
408 membrane leads to a partial complementation of the anion current compared to *clca-2* KO  
409 mutant (Figure 1). Indeed, AtCLCa<sub>E203A</sub> is able to transport anions but the currents measured  
410 in vacuoles extracted from *clca-2/35S:CLCa<sub>E203A</sub>* plants respond differently to variations of  
411 the cytosolic pH compared to plants expressing the wild-type form of AtCLCa. In *clca-*  
412 *2/35S:CLCa<sub>E203A</sub>* vacuoles, the ionic currents display a reversal potential close to the Nernst  
413 potential for NO<sub>3</sub><sup>-</sup> confirming that AtCLCa<sub>E203A</sub> mediates passive ion fluxes independent from  
414 the pH gradient existing across the tonoplast. These results confirm the data obtained in a  
415 previous work performed in *Xenopus* oocytes (Bergsdorf et al., 2009). **Based on these**  
416 **findings and the seven-fold higher selectivity of AtCLCa for nitrate than for chloride (De**  
417 **Angeli et al., 2006; Wege et al., 2010),** we expected that the *clca-2/35S:CLCa<sub>E203A</sub>* lines  
418 would be less efficient in accumulating NO<sub>3</sub><sup>-</sup> in the vacuole. A passive ion transport system in  
419 the tonoplast would drive a vacuolar nitrate accumulation 10-15 times lower than an  
420 exchanger (Cookson et al., 2005; De Angeli et al., 2006). In line with this prediction, the  
421 kinetic measurements performed *in planta* to analyze nitrate storage and remobilization show  
422 a strong decrease of nitrate storage rates in the shoot of *clca-2/35S:AtCLCa<sub>E203A</sub>* compared to  
423 *Ws-2* and *clca-2* (Figures 5A and 6). **Interestingly, in these experiments, we observed an**  
424 **inverse correlation between the accumulation of chloride and nitrate: the plants likely**  
425 **accumulate chloride to compensate the amount of negative charges inside the cells and**  
426 **maintain the electrochemical potential gradients through the membranes when nitrate is scarce**  
427 **(Supplemental Figure S5).** These results confirm that AtCLCa<sub>E203A</sub> mediates passive nitrate  
428 fluxes across vacuolar membranes whereas the exchanger activity is not required for efficient  
429 accumulation of chloride.

430

431 **The coupling of proton and anion transport by AtCLCa is crucial for water content and**  
432 **to ensure the function of nitrate as an osmoticum**

433 Stomata guard cells are widely used as model to study the molecular mechanisms involved in  
434 the adjustment of cell turgor. Both *clca-2* and *clca-2/35S:AtCLCa<sub>E203A</sub>* are impaired in  
435 stomata aperture in response to light due to an under-accumulation of anions in the vacuoles  
436 (Figure 3). This result confirms our previous conclusions on the importance of AtCLCa in the  
437 control of the osmotic pressure (Wege et al., 2014). Additionally, comparing wild-type, *clca-2*  
438 and *clca-2/35S:AtCLCa<sub>E203A</sub>* plants, we observed here a close correlation between shoot water  
439 and nitrate contents (Figures 4A and 5A) which are both reduced in *clca* mutants indicating  
440 the importance of AtCLCa in nitrate and water homeostasis. Furthermore, the similar levels of  
441 potassium and other main inorganic anions, chloride, phosphate and sulfate, between the  
442 genotypes (Figures 5B and 5C) confirm the function of nitrate as an osmoticum (McIntyre,  
443 1997). Our results corroborate previous published work (Cardenas-Navarro et al., 1999).  
444 More recently, it was shown, using different mutants of nitrate transporters in Arabidopsis,  
445 that the nitrate content in shoots is correlated to the water transport capacity of the roots (Li et  
446 al., 2016). This could also be the case in our different genotypes, especially since *AtCLCa* is  
447 expressed in mesophyll and guard cells (Geelen et al., 2000; Wege et al., 2014).

448 In parallel, the characterization of *clca* mutants reveals that AtCLCa and its glutamate 203 are  
449 essential to sustain plant fresh weight (Figure 2). Several hypotheses can be proposed to  
450 explain this result. First, an altered response of the different transgenic plants to ABA, the  
451 hormone involved in water homeostasis, may inhibit the growth. We showed that stomata of  
452 *clca-2* and *clca-2/35S:AtCLCa<sub>E203A</sub>* plants respond very weakly to ABA (Figure 3B) which  
453 indicates that the sensitivity to ABA is modified in these plants. However, this hypothesis by  
454 itself cannot explain the difference observed in cell size and water content between *clca-2* and  
455 *clca-2/35S:AtCLCa<sub>E203A</sub>* lines as the defects in stomata movements are similar in these  
456 genotypes. Second, the plants may be disturbed in cytosolic chloride homeostasis, as AtCLCa  
457 is able to transport chloride albeit with low affinity compared to nitrate (De Angeli et al.,  
458 2006; Wege et al., 2010). The kinetic experiments showed that chloride content does not  
459 decrease as much in the *clca-2/35S:AtCLCa<sub>E203A</sub>* lines as in the other genotypes when nitrate  
460 is added to the growth medium (Supplemental Figure S5B). Nevertheless, the measured  
461 concentrations are below the toxic values and could only account partially for the observed  
462 growth phenotype (Jossier et al., 2010). Third, the decrease in stomata aperture may lead to a

463 reduction of gas exchange with the atmosphere and consequently to an inhibition of the  
464 photosynthesis rate (Figure 3). In mammals, it has been suggested that the CLC exchangers  
465 work in tandem with the V-ATPase to maintain intra-compartment pH maintenance (Satoh et  
466 al., 2017). A disruption of pH homeostasis in the different *clca-2* lines could also explain the  
467 difference in plant fresh weight (Krebs et al., 2010; Demes et al., 2020). Finally, the simplest  
468 hypothesis may be that the decrease of vacuolar NO<sub>3</sub><sup>-</sup> storage in these genotypes underlies a  
469 reduction of cell water potential (Figure 4). It was shown that, during root growth, the  
470 vacuolar osmotic potential is important for turgor pressure and to drive cell elongation  
471 (Dünser et al., 2019; Kaiser and Scheuring, 2020). It seems plausible that a similar  
472 mechanism operates in mesophyll cells: the under-accumulation of nitrate could lead to lower  
473 cell expansion which would in turn limit plant growth. Altogether, these results demonstrate  
474 the crucial role of a nitrate/proton exchanger on the vacuolar membrane to maintain water  
475 homeostasis and cell expansion in Arabidopsis.

476

#### 477 **The NO<sub>3</sub><sup>-</sup>/H<sup>+</sup> exchanger activity of AtCLCa is essential for the regulation of nitrate** 478 **assimilation and consequently for NUE**

479 It has been shown that most of the nitrate in leaves is stored in vacuoles of mesophyll cells  
480 (Martinoia et al., 1981; Miller and Smith, 2008). The decrease of nitrate in rosette leaves  
481 observed in *clca-2/35S:AtCLCa<sub>E203A</sub>* plants is most probably due to a reduction of vacuolar  
482 nitrate storage. Then this defect in *AtCLCa<sub>E203A</sub>* over-expressing lines probably perturbs  
483 nitrate cytosolic homeostasis and, consequently results in the increase of NR activity, which  
484 would drive to higher synthesis amounts of amino acids and proteins than in *Ws-2* and *clca-2*  
485 (Figure 7). These results also confirm that the increase of intracellular nitrate concentration  
486 enhances the activity of NR (Aslam et al., 1987). However, the absence of AtCLCa in KO  
487 mutant does not lead to increase of amino acids and protein contents as in *AtCLCa<sub>E203A</sub>* over-  
488 expressing lines, whereas cytosolic nitrate homeostasis is also perturbed in *clca-2*  
489 (Monachello et al., 2009). This difference might be explained by the fact that *AtCLCa<sub>E103A</sub>* is  
490 expressed under the 35S promoter and is most likely active in cells of these transgenic lines in  
491 which it is not normally expressed in wild-type plants.

492 Among the amino acids over-accumulated in the *clca-2/35S:AtCLCa<sub>E203A</sub>* transgenic lines  
493 (Figure 7B), asparagine and glutamine are amongst the ones preferentially transported  
494 through the plant (Havé et al., 2017). Serine and glycine, also accumulated in the over-



495 expressors, may reflect an increase of photorespiration, the pathway that supplies reductants  
496 such as NADPH necessary for nitrate assimilation in C3 plants (Migge et al., 2000; Oliveira et  
497 al., 2002; Bloom, 2015). Analyses of the activity of this metabolic pathway will have to be  
498 performed to confirm this hypothesis. In parallel, *clca-2/35S:AtCLCa<sub>E203A</sub>* lines accumulate  
499 four time more malate in than wild-type (Figure 5D). This increase is not trivial, as malate is a  
500 trivalent anion that could compensate nitrate negative charge depletion charges in the  
501 vacuolar lumen when nitrate concentration is decreased. However, malate is also a substrate  
502 of the photorespiratory pathway producing reductants. Further, the NR activity requires two  
503 protons to reduce one molecule of nitrate into nitrite (Feng et al., 2020). Malate synthesis  
504 could then be stimulated to compensate the alkalization due to the increase of nitrate  
505 assimilation (Eisenhut et al., 2019; Bloom, 2015; Feng et al., 2020).

506 At the reproductive stage, *clca-2* and, to a greater extent, *clca-2/35S:AtCLCa<sub>E203A</sub>* lines  
507 showed a different allocation of nitrogen in the plant organs, resulting in a higher NUE  
508 (Figure 8). These results reflect an enhanced ability of seeds to store N independently of the  
509 plant to produce seeds and indicate variation in N fluxes during the reproductive phase.  
510 Expression of *AtCLCa* was reported in roots, rosette leaves and siliques, but not in seeds  
511 (David et al., 2014; Geelen et al., 2000). The large increase in seed N allocation in *clca-2/*  
512 *35S:AtCLCa<sub>E203A</sub>* lines compared *Ws-2* and *clca-2* probably results from an indirect effect of  
513 *AtCLCa* defect in the rosette and stem compartments (stem inflorescences + silique  
514 envelopes). Surprisingly, the change in NUE was found not to be due to an increase in N  
515 remobilization under this growth condition as NRE values were similar between the various  
516 lines. In contrast, the RSA ratio was significantly reduced in the *clca-2* background lines  
517 indicating a higher N uptake after flowering. Our previous study showed that root nitrate  
518 influx is reduced in *clca* KO mutants but measurements were performed at vegetative stage  
519 (Monachello et al., 2009). However, more recent work suggested that vacuolar nitrate  
520 transporters like CLCs drive an increase in root N uptake and/or a higher root/shoot  
521 translocation at later stages (He et al., 2017; Li et al., 2020) and may explain the low values of  
522 RSA ratio obtained in *clca-2* lines in our study. The difference of NUE observed between  
523 *clca-2* and *clca-2/35S:AtCLCa<sub>E203A</sub>* lines could be due to a lower nitrate storage capacity in  
524 both the rosette and reproductive organs in *AtCLCa<sub>E203A</sub>* over-expressors. This result  
525 illustrates the importance of nitrogen storage in leaves, stem inflorescence, and siliques for  
526 nitrate uptake by roots and nitrogen allocation in plant organs during seed filling. Nitrate  
527 uptake relies on  $\text{NO}_3^-/\text{H}^+$  symporters. The changes in cytosolic nitrate concentration, cytosolic

528 pH and nitrate assimilation linked to the absence of AtCLCa or the presence of the uncoupled  
529 form of AtCLCa could then modify the activities of these plasma membrane transporters  
530 (Feng et al., 2020; Filleur and Daniel-Vedele, 1999). Altogether, this finding highlights the  
531 importance of the proton antiport activity of AtCLCa for regulating nitrate assimilation and  
532 consequently NUE.

533

## 534 **Conclusion**

535 Based on peptide sequence analysis of the closest homologs of AtCLCa from algae,  
536 lycophytes, bryophytes and spermaphytes, each species has conserved at least one CLC with  
537 the gating glutamate residue ([Supplemental Figure S8](#)). This conservation suggested a very  
538 strong importance of this residue in the green lineage. Our study on the physiological  
539 consequences of the mutation in the gating glutamate of AtCLCa provide insights on the  
540 selective pressure underlying the conservation of an exchanger rather than a channel for this  
541 protein. Although this mutation leads to a higher plant nutritional value and better NUE, it  
542 also induces a decrease of plant growth due to water homeostasis disruption expected to  
543 severely impair plant fitness. The conservation of the exchange mechanism of AtCLCa is then  
544 likely to be correlated to the maintenance of water homeostasis irrespective of the external  
545 nitrogen fluctuations. A previous study showed that a decrease of the nitrate vacuolar  
546 sequestration in roots induces a higher translocation to the shoot, a higher assimilation and  
547 biomass (Han et al., 2016). Therefore, we could wonder if a root-specific expression of  
548 *AtCLCa<sub>E203A</sub>* would provide plants with high protein level and NUE, but without the  
549 associated growth disruption probably due to the expression of *AtCLCa* in mesophyll and  
550 guard cells. This may give new clues to generate plants with higher NUE without disturbing  
551 water homeostasis.

552

553

## 554 **MATERIALS AND METHODS**

### 555 **Accession number**

556 Sequence data from this article can be found in the GenBank/EMBL data libraries under the  
557 accession number At5g40890.

## 558 **Plant material**

559 Experiments were performed on *Arabidopsis thaliana* (accession Wassilewskija [Ws-2]) wild-  
560 type plants and T-DNA insertion mutant *clca-2* (De Angeli et al., 2006). The *clca-*  
561 *2/35S:AtCLCa* complemented line was produced in a previous work (Wege et al., 2010).  
562 *AtCLCa<sub>E203A</sub>* point mutation was introduced in *AtCLCa* cDNA using the QuikChange II XL  
563 Site-Directed Mutagenesis Kit (Stratagene) into the Gateway vector pH2GW7.0 (Karimi et  
564 al., 2002) under the control of the 35S promoter or into the Gateway pMDC43 vector (Curtis  
565 and Grossniklaus, 2003) allowing the fusion of GFP at the N-terminal part of *AtCLCa*. For  
566 *clca-2/pAtCLCa:AtCLCa* and *clca-2/pAtCLCa:AtCLCa<sub>E203A</sub>* lines generation, a 1.9-kb  
567 fragment of *AtCLCa* promoter was produced by PCR amplification on genomic DNA ([Ws-2]  
568 accession) using purified primer pair: 5'- nnnnnccgggggttttgcactcactattt-3' (Forward) and  
569 5'-nnnnnactagttgggtggatgggtaccatat-3' (Reverse). The PCR fragment was cloned into  
570 pH2GW7.0 between *SmaI* and *SpeI* restriction sites upstream *AtCLCa* or *AtCLCa<sub>E203A</sub>* cDNA  
571 sequences. Those constructs were used to transform T-DNA knockout plant for *AtCLCa*  
572 (*clca-2*) by floral-dipping (Clough and Bent, 1998). The seeds were selected on hygromycin  
573 B (20 µg.mL<sup>-1</sup>) and two T3 homozygous lines were chosen.

## 574 **Plant growth conditions**

575 All experiments were performed on plants grown under short days conditions (8h light, 16h  
576 dark) at 22°C, 60% relative humidity, 75 µE light intensity. Water and potassium content  
577 experiments were performed in plants grown for five to seven weeks in Jiffy® peat pellets.  
578 For fresh weight and anion, amino acids and proteins content determinations, plants were  
579 grown hydroponically for four to five weeks. Seeds were sterilized and sown on seed-holders  
580 (Araponics, Liège, Belgium) filled with half-strength MS medium containing 0.60%  
581 phytoagar. The boxes were filled with MilliQ water, put at 4°C for 4 days for seeds  
582 stratification, and then transferred in the culture room. Once roots have emerged in water  
583 solution, the medium is replaced by a modified Hoagland nutrient solution (1.5 mM  
584 Ca(NO<sub>3</sub>)<sub>2</sub>, 1.25 mM KNO<sub>3</sub>, 0.75 mM MgSO<sub>4</sub>, 0.28 mM KH<sub>2</sub>PO<sub>4</sub>, micronutrients [KCl 50  
585 µM, H<sub>3</sub>BO<sub>3</sub> 25 µM, ZnSO<sub>4</sub> 1 µM, CuSO<sub>4</sub> 0.5 µM, Na<sub>2</sub>MoO<sub>4</sub> 0.1 µM, MnSO<sub>4</sub> 5 µM], chelated  
586 iron Fe-HBED 20 µM and MES 2 mM pH 5.7 with KOH). Nutrient solutions were replaced  
587 twice a week. For nitrate starvation experiments, five weeks plants roots grown in hydroponic  
588 system were rinsed twice in the nitrate starvation medium (Ca(NO<sub>3</sub>)<sub>2</sub> replaced by CaSO<sub>4</sub> 1.5  
589 mM and KNO<sub>3</sub> by KCl 1.25 mM) and plants were put on the starvation medium for 120h. For

590 nitrate storage experiment, 4 weeks plants were nitrate starved for 10 days, then nitrate  
591 starvation medium was replaced by complete Hoagland nutrient solution for 120 h. For all of  
592 these experiments, six plants per genotype for each time point were harvested, rosettes and  
593 roots separately. Those experiments were performed three times.

594 For measurement of NUE at reproductive stage, seeds were stratified in tubes containing  
595 water in a cold room for 2 days at 4°C in the dark. After stratification, seeds were directly  
596 sown on sand and watered with a 10-mM nitrate solution. Plants were grown in a climatic  
597 chamber, in short days (8/16 h day/night photoperiod) during 7 weeks then transferred in long  
598 days (12/12 h day/night photoperiod) until final harvest. Composition of nutritive solution is  
599 described in Chardon et al. (2010). Six to nine plants per genotype were harvested. The  
600 experiment was performed twice.

601 **<sup>15</sup>N labelling and determination of N partitioning, N remobilization, relative specific**  
602 **absorption and NUE**

603 On week before the transfer, when the plant were in exponential vegetative growth, plants  
604 were watered with a 10 mM <sup>15</sup>NO<sub>3</sub><sup>-</sup> 10% enrichment solution. To analyze unlabeled samples,  
605 a few <sup>15</sup>NO<sub>3</sub><sup>-</sup>-free plants were harvested in order to determine the <sup>15</sup>N natural abundance.  
606 After two days, sand was rinsed twice in osmotic water baths. At the end of their cycle, when  
607 all seeds were mature and the rosette dry, plants were harvested. Samples were separated as  
608 (i) rosette (rosette leaves), (ii) stem (inflorescence stem + cauline leaves + empty dry  
609 siliques), and (iii) seeds (total seeds). The dry weight of rosette, stem and seeds was  
610 determined. Subsamples of 1000–2000 µg were carefully weighed in tin capsules to determine  
611 the total N percentage (N% as mg (100 mg DW)<sup>-1</sup>) and the <sup>15</sup>N abundance using a FLASH  
612 2000 Organic Elemental Analyzer (Thermo Fisher Scientific) coupled to a Delta V Advantage  
613 isotope ratio mass spectrometer (Thermo Fisher Scientific). The <sup>15</sup>N abundance in each  
614 sample was measured as atom percent and defined as  $A\% = 100 \times ({}^{15}\text{N}) / ({}^{15}\text{N} + {}^{14}\text{N})$ . In unlabeled  
615 plant controls, A% control was 0.3660. The <sup>15</sup>N enrichment (E%) of the plant material was  
616 then calculated as  $(A\%_{\text{sample}} - A\%_{\text{control}})$ . The absolute quantity of N and <sup>15</sup>N contained in  
617 the sample was calculated as  $\text{QtyN} = \text{DW} \times \text{N}\%$  and  $\text{Qty}^{15}\text{N} = \text{DW} \times \text{E}\% \times \text{N}\%$ , respectively.  
618 Different parameters used to evaluate HI, NUE, N remobilization, and its components were  
619 defined as follows:

620 
$$\text{HI} = \text{DW}_{\text{seeds}} / (\text{DW}_{\text{rosette}} + \text{DW}_{\text{stem}} + \text{DW}_{\text{seeds}}),$$
  
621 
$$\text{N allocation in rosette} = \text{QtyN}_{\text{rosette}} / (\text{QtyN}_{\text{rosette}} + \text{QtyN}_{\text{stem}} + \text{QtyN}_{\text{seeds}}),$$

622  $N_{\text{allocation in stem}} = \text{Qty}N_{\text{stem}} / (\text{Qty}N_{\text{rosette}} + \text{Qty}N_{\text{stem}} + \text{Qty}N_{\text{seeds}}),$   
623  $N_{\text{allocation in seeds (NHI)}} = \text{Qty}N_{\text{seeds}} / (\text{Qty}N_{\text{rosette}} + \text{Qty}N_{\text{stem}} + \text{Qty}N_{\text{seeds}}),$   
624  $\text{NRE} = {}^{15}\text{NHI}/\text{HI},$   
625  $\text{RSA} = {}^{15}\text{NHI}/\text{NHI}$   
626  $\text{NUE} = \text{NHI}/\text{HI}$

## 627 **RT-qPCR analysis**

628 Total plants RNA were extracted from 4 weeks plants using the RNeasy kit (Qiagen,  
629 Germany) and two micrograms of RNA was reverse-transcribed using SuperScript IV<sup>TM</sup>  
630 Reverse Transcriptase according to the manufacturer's instructions (Thermo Fisher  
631 Scientific). Real-time PCR was performed on cDNAs in a final volume of 10  $\mu\text{L}$  using SYBR  
632 Green I master mix (Roche Life Science) and primers for *AtCLCa* gene, 5'-  
633 atcaaatggagatggcttcg-3' (Forward) and 5'-ctcaagagcgaaaagtactc-3' (Reverse), and *Actin2*  
634 reference gene, 5'-ggtaacattgtgctcagtggtgg-3' (Forward) and 5'-aacgaccttaatcttcatgct-3'  
635 (Reverse). The reactions were performed in a LightCycler<sup>®</sup> 96 Real-Time PCR system (Roche  
636 Life Science). Samples were subjected to ten minutes of pre-incubation at 95°C, then 45  
637 amplification cycles with 15 seconds at 95°C, 15 seconds at 60°C and 15 seconds at 72°C. A  
638 high resolution melting was performed to assess amplification specificity and several cDNA  
639 dilutions were tested to perform primers efficiency calculation. The results were analyzed  
640 using the LightCycler<sup>®</sup> Software (Roche Life Science) and normalized with the *Actin 2* gene  
641 expression.

## 642 **Confocal microscopy**

643 *AtCLCa<sub>E203A</sub>* localization was checked with a confocal microscope Leica TCS SP8 using the  
644 fusion of GFP at the N-terminal part of *AtCLCa*. The GFP was excited at 488 nm and its  
645 fluorescence emission signal was analyzed between 500 and 525 nm.

## 646 **Electrophysiological experiments**

647 Vacuoles for electrophysiological experiments were extracted from *A. thaliana* mesophyll  
648 protoplasts as described before (Song et al., 2003). Patch clamp recordings were performed in  
649 the whole-vacuole confirmation and recorded with a HEKA amplifier EPC-10 USB (HEKA,  
650 Lambrecht-Pfalz, Germany). The recordings were acquired and controlled with the software  
651 PatchMaster (HEKA, Lambrecht-Pfalz, Germany). Currents were induced by five-second  
652 pulses from -97 to +63 mV in 20 mV increments and the potentials were corrected by the  
653 liquid junction potential (Neher, 1992). Standard solutions contained: (vacuolar) 200 mM

654 BTP NO<sub>3</sub><sup>-</sup>, 2 mM MgCl<sub>2</sub>, 0.1 mM CaCl<sub>2</sub>, 10mM MES pH 5.5; (cytosolic) 20 mM Bis-Tris-  
655 Propane (BTP) Cl<sup>-</sup>, 10 mM MES pH 7, 0.1 mM CaCl<sub>2</sub>, 2 mM MgCl<sub>2</sub>; pH 7. Cytosolic NO<sub>3</sub><sup>-</sup>-  
656 solutions containing 0.1 mM Ca(NO<sub>3</sub>)<sub>2</sub>, 2 mM Mg(NO<sub>3</sub>)<sub>2</sub>, 10 mM BTP were adjusted to pH 7  
657 or pH 9 with MES. The osmolarity of the solutions was adjusted to  $\pi$ = 600 mOsm with  
658 sorbitol. Only measurements of stable vacuoles that returned to initial reversal potentials in  
659 the starting conditions were considered.

## 660 **Plants compounds content and nitrate reductase activity measurements**

661 For nitrate and chloride content measurements, shoot and root of five weeks old plants were  
662 harvested separately, weighted and fast frozen in liquid nitrogen. Plants material was  
663 grounded, homogenized in 1 mL (shoot) or 500  $\mu$ L (root) of MilliQ water and exposed to  
664 three successive freeze-thaw cycles. After the last thawing, plants material was centrifuged 10  
665 minutes at full speed to pellet cell debris and recover the supernatant that will be used for  
666 nitrate and chloride colorimetric assays (Miranda et al., 2001). For anion content  
667 determination, the shoot samples were used for HPLC analysis (ICS5000, ThermoFisher) or  
668 for malate determination using the Biovision<sup>TM</sup> kit. For potassium content analysis, shoot  
669 were harvested and dried at 60°C 3 days. The dried samples were digested into 2 mL of 70 %  
670 nitric acid in a DigiBlock ED36 (LabTech) at 80°C for 1 h, 100°C for 1 h and then 120°C for  
671 2h. After dilution in ultra-pure water, the potassium content was determined by atomic  
672 absorption spectrometry using an AA240FS flame spectrometer (Agilent Technologies).

673 The nitrate reductase activity was determined as described in Kim and Seo (2018). For amino-  
674 acids quantification, plants shoots were fast frozen in liquid nitrogen and lyophilized  
675 overnight. Dried material was weighted to equalize the amount of samples and finely  
676 grounded in liquid nitrogen with a pestle and mortar. Polar metabolites were extracted into  
677 80% methanol, 20% water containing 0.2 mM  $\alpha$  -Amino-n-Butyric Acid ( $\alpha$ -ABA) as an  
678 internal standard. The samples were centrifuged and several aliquots were dried overnight  
679 under vacuum. Prior to HPLC analysis (Waters Alliance instrument with a Waters 2475  
680 multi-wavelength fluorescence detector), aliquots were resuspended in milliQ water and  
681 filtered into autosampler vials before precolumn derivatization. Standard amino-acids  
682 solutions were used for calibration curve generation; a correction was performed using  
683 internal standard variation and normalized with dry weight. For soluble protein content  
684 determination, 100 mg of each plant was harvested and grounded in liquid nitrogen. Then,  
685 350  $\mu$ l of extraction buffer (50 mM Hepes/NaOH pH 7.2, 1.5 mM MgCl<sub>2</sub>, 1 mM EGTA 0.2M,

686 10% glycerol, 1% Triton, 2 mM PMSF, 150 mM NaCl, antiprotease-EDTA) were added  
687 before vortex homogenization. Samples were incubated under agitation for 30 minutes at 4°C.  
688 After centrifugation, supernatant were recovered and used for total soluble protein content  
689 determination using a standard Bradford assay (Bradford, 1976).

### 690 **Stomata dynamics measurements**

691 Stomata bioassay were performed on five weeks-old plants as described in Jossier et al.  
692 (2010). Two hours before the beginning of the light period, plants were collected and two  
693 leaves per genotype were glued on cover slides with surgical glue (Hollister Medical  
694 Adhesive, Adapt™ 7730) to peel the epidermis. Those cover slides were immediately  
695 immersed in MES/KCl buffer (50 mM, pH 6.15 with KOH) and kept in the dark for 1 hour.  
696 After this dark period, images were acquired for initial stomata aperture measurements and  
697 then the aperture was monitored after opening induction by 75 μE of light for 4h30 at 22°C.  
698 For stomata closing experiment, additionally, the epidermis were incubated for 3 hours with  
699 50 μM of Abscisic acid and the aperture area was determined. Images acquisition was  
700 performed with a 40X objective on a wide field inverted microscope (DMI600B, Leica,  
701 Imagerie Gif, Gif-Sur-Yvette) coupled with a Hamamatsu camera. To capture stomata  
702 images, Z-stacks were acquired to obtain a clear image of all cells. Ostiole area determination  
703 was performed automatically on different types of z-projections, in a procedure we developed  
704 with ImageJ software (Schneider et al., 2012); [Supplemental methods](#)). Measurements were  
705 performed on 86-150 stomata per genotype per treatment (two leaves) and repeated three  
706 times.

### 707 **Plants water content measurements**

708 For water content analysis, plants rosettes were harvested and weighted (n=10 for each  
709 genotype, N=3 biological replicates), rosettes were dried for three days at 65°C and relative  
710 water content was calculated as : (FreshWeight-DryWeight)/FreshWeight. Relative water  
711 contents were determined similarly during the dehydration tests performed under a laminar  
712 flow hood on seven weeks plants as described by Wege et al. (2014).

### 713 **Cell size determination**

714 Flow cytometry was used to determine relative cell size of plants leaves. On five weeks old  
715 plants, seven leaves of three plants per genotype were harvested and digested with an  
716 enzymatic mix (1 % cellulase R-10, 0.2 % Macerozyme R-10, 0.4 M Mannitol, 20 mM KCl,

717 20 mM MES/KOH pH 5.7, 10 mM CaCl<sub>2</sub>, 0.1% w/v BSA) for three hours. Protoplasts were  
718 retrieved by centrifugation at low speed (100 g) for two minutes. Protoplasts were re-  
719 suspended in an appropriate solution (1 mM CaCl<sub>2</sub>, 10 mM MES pH 5.3 (KOH), 594 mOsm  
720 with sorbitol). Then, they were filtered through a 50 µm nylon filter, and analysed on a MoFlo  
721 Astrios cytometer, driven by Summit 6.3 (Beckman-Coulter). Chlorophyll was excited by a  
722 488 nm solid-state laser (150 mW), taking emission at 664/22 nm. Forward Scatter (FSC,  
723 size) and Side Scatter (SSC, granularity) were taken on the 488 nm laser. The first region of  
724 interest (gate) was focused on events with high homogenous fluorescence in chlorophyll.  
725 Then, mean values of FSC-Area and SSC-Area parameters were taken with the same gating  
726 strategy for each sample. Each histogram comprised more than 30,000 protoplasts.

727

728

## 729 **ACKNOWLEDGMENTS**

730 We thank Romain Le Bars (Imagerie-Gif Platform, I2BC, Gif-sur-Yvette, France) for his  
731 technical support with confocal microscopy, Caroline Mauve et Françoise Gilard  
732 (Metabolomic platform, IPS2, Gif-sur-Yvette, France) for their help analyzing amino acids  
733 contents. Thank to Eugene Diatloff for its critical reading of the manuscript. This work has  
734 benefited from Imagerie-Gif core facility supported by the ‘Agence Nationale de la  
735 Recherche’ (ANR-11-EQPX-0029/Morphoscope, ANR-10-INBS-04/FranceBioImaging;  
736 ANR-11-IDEX-0003-02/ Saclay Plant Sciences), is supported by an ANR grant (ANR-  
737 VACTION: ANR-16-CE92-0004-21), the LabEx Saclay Plant Sciences-SPS (ANR-10-  
738 LABX-0040-SPS), the ‘Centre National de la Recherche Scientifique’ (CNRS), the  
739 University Paris Cité and the University Paris-Saclay.

740

## 741 **AUTHOR CONTRIBUTIONS**

742 A.D.A., S.T. and S.F. designed the project. J.H., C.L., C.E. and F.A.C. performed the  
743 experiments, M.B. conducted the cytometry measurements. M.W.B. developed the macro  
744 running under Image J to analyze the ostiole area. J.H., C.L., C.E. and A.D.A. analyzed the  
745 data. A.M. and F.C. performed and analyzed the NUE experiment. J.H., C.L. and S.F. wrote  
746 the manuscript. All authors revised the article.



747

748 **REFERENCES**

- 749 **Aslam, M., Rosichan, J.L., and Huffaker, R.C.** (1987). Comparative Induction of Nitrate  
750 Reductase by Nitrate and Nitrite in Barley Leaves. *Plant Physiol.* **83**: 579–584.
- 751 **Bergsdorf, E.-Y., Zdebik, A.A., and Jentsch, T.J.** (2009). Residues important for  
752 nitrate/proton coupling in plant and mammalian CLC transporters. *J Biol Chem* **284**:  
753 11184–11193.
- 754 **Bloom, A.J.** (2015). Photorespiration and nitrate assimilation: a major intersection between  
755 plant carbon and nitrogen. *Photosynth Res* **123**: 117–128.
- 756 **Boyer, J.S.** (1968). Relationship of water potential to growth of leaves. *Plant Physiol* **43**:  
757 1056–1062.
- 758 **Bradford, M.M.** (1976). A rapid and sensitive method for the quantitation of microgram  
759 quantities of protein utilizing the principle of protein-dye binding. *Analytical*  
760 *Biochemistry* **72**: 248–254.
- 761 **Brouwer, R.** (1962). Nutritive influences on the distribution of dry matter in the plant.  
762 *Netherlands Journal of Agricultural Science*: 399–408.
- 763 **Cardenas-Navarro, R., Adamowicz, S., and Robin, P.** (1999). Nitrate accumulation in  
764 plants: a role for water. *J. Exp. Bot.* **50**: 613–624.
- 765 **Castaigns, L., Camargo, A., Pocholle, D., Gaudon, V., Texier, Y., Boutet-Mercey, S.,**  
766 **Taconnat, L., Renou, J.-P., Daniel-Vedele, F., Fernandez, E., Meyer, C., and**  
767 **Krapp, A.** (2009). The nodule inception-like protein 7 modulates nitrate sensing and  
768 metabolism in *Arabidopsis*. *Plant J* **57**: 426–435.
- 769 **Chardon, F., Barthélémy, J., Daniel-Vedele, F., and Masclaux-Daubresse, C.** (2010).  
770 Natural variation of nitrate uptake and nitrogen use efficiency in *Arabidopsis thaliana*  
771 cultivated with limiting and ample nitrogen supply. *J Exp Bot* **61**: 2293–2302.
- 772 **Chardon, F., Noël, V., and Masclaux-Daubresse, C.** (2012). Exploring NUE in crops and in  
773 *Arabidopsis* ideotypes to improve yield and seed quality. *J Exp Bot* **63**: 3401–3412.
- 774 **Chen, B.M., Wang, Z.H., Li, S.X., Wang, G.X., Song, H.X., and Xi-Na, W.** (2004). Effects  
775 of nitrate supply on plant growth, nitrate accumulation, metabolic nitrate concentration  
776 and nitrate reductase activity in three leafy vegetables. *Plant Sci.* **167**: 635–643.
- 777 **Clough, S.J. and Bent, A.F.** (1998). Floral dip: a simplified method for *Agrobacterium*-  
778 mediated transformation of *Arabidopsis thaliana*. *Plant J* **16**: 735–743.
- 779 **Cookson, S.J., Williams, L.E., and Miller, A.J.** (2005). Light-dark changes in cytosolic  
780 nitrate pools depend on nitrate reductase activity in *Arabidopsis* leaf cells. *Plant*  
781 *Physiol* **138**: 1097–1105.

- 782 **Costa, A., Gutla, P.V.K., Boccaccio, A., Scholz-Starke, J., Festa, M., Basso, B., Zanardi,**  
783 **I., Pusch, M., Schiavo, F.L., Gambale, F., and Carpaneto, A.** (2012). The  
784 Arabidopsis central vacuole as an expression system for intracellular transporters:  
785 functional characterization of the Cl<sup>-</sup>/H<sup>+</sup> exchanger CLC-7. *J Physiol* **590**: 3421–  
786 3430.
- 787 **Crawford, N.M.** (1995). Nitrate: nutrient and signal for plant growth. *Plant Cell* **7**: 859–868.
- 788 **Curtis, M.D. and Grossniklaus, U.** (2003). A gateway cloning vector set for high-  
789 throughput functional analysis of genes in planta. *Plant Physiol* **133**: 462–469.
- 790 **David, L.C., Dechorgnat, J., Berquin, P., Routaboul, J.M., Debeaujon, I., Daniel-Vedele,**  
791 **F., and Ferrario-Méry, S.** (2014). Proanthocyanidin oxidation of Arabidopsis seeds  
792 is altered in mutant of the high-affinity nitrate transporter NRT2.7. *J Exp Bot* **65**: 885–  
793 893.
- 794 **De Angeli, A., Monachello, D., Ephritikhine, G., Frachisse, J.M., Thomine, S., Gambale,**  
795 **F., and Barbier-Brygoo, H.** (2006). The nitrate/proton antiporter AtCLCa mediates  
796 nitrate accumulation in plant vacuoles. *Nature* **442**: 939–942.
- 797 **Dechorgnat, J., Nguyen, C.T., Armengaud, P., Jossier, M., Diatloff, E., Filleur, S., and**  
798 **Daniel-Vedele, F.** (2011). From the soil to the seeds: the long journey of nitrate in  
799 plants. *J Exp Bot* **62**: 1349–1359.
- 800 **Demes, E., Besse, L., Cubero-Font, P., Satiat-Jeunemaitre, B., Thomine, S., and De**  
801 **Angeli, A.** (2020). Dynamic measurement of cytosolic pH and [NO<sub>3</sub><sup>-</sup>] uncovers the  
802 role of the vacuolar transporter AtCLCa in cytosolic pH homeostasis. *Proc Natl Acad*  
803 *Sci U S A* **117**: 15343–15353.
- 804 **Dünser, K., Gupta, S., Herger, A., Feraru, M.I., Ringli, C., and Kleine-Vehn, J.** (2019).  
805 Extracellular matrix sensing by FERONIA and Leucine-Rich Repeat Extensins  
806 controls vacuolar expansion during cellular elongation in Arabidopsis thaliana. *EMBO*  
807 *J* **38**: e100353.
- 808 **Dutzler, R., Campbell, E.B., Cadene, M., Chait, B.T., and MacKinnon, R.** (2002). X-ray  
809 structure of a Cl<sup>-</sup> channel at 3.0 Å reveals the molecular basis of anion  
810 selectivity. *Nature* **415**: 287–294.
- 811 **Dutzler, R., Campbell, E.B., and MacKinnon, R.** (2003). Gating the selectivity filter in Cl<sup>-</sup>  
812 chloride channels. *Science* **300**: 108–112.
- 813 **Eisenhut, M., Roell, M.-S., and Weber, A.P.M.** (2019). Mechanistic understanding of  
814 photorespiration paves the way to a new green revolution. *New Phytol* **223**: 1762–  
815 1769.
- 816 **von der Fecht-Bartenbach, J., Bogner, M., Dynowski, M., and Ludewig, U.** (2010). CLC-  
817 b-mediated NO<sub>3</sub><sup>-</sup>/H<sup>+</sup> exchange across the tonoplast of Arabidopsis vacuoles. *Plant*  
818 *Cell Physiol* **51**: 960–968.
- 819 **Feng, H., Fan, X., Miller, A.J., and Xu, G.** (2020). Plant nitrogen uptake and assimilation:  
820 regulation of cellular pH homeostasis. *J Exp Bot* **71**: 4380–4392.

- 821 **Filleur, S. and Daniel-Vedele, F.** (1999). Expression analysis of a high-affinity nitrate  
822 transporter isolated from *Arabidopsis thaliana* by differential display. *Planta* **207**: 461–  
823 469.
- 824 **Geelen, D., Lurin, C., Bouchez, D., Frachisse, J.M., Lelièvre, F., Courtial, B., Barbier-**  
825 **Brygoo, H., and Maurel, C.** (2000). Disruption of putative anion channel gene  
826 *AtCLC-a* in *Arabidopsis* suggests a role in the regulation of nitrate content. *Plant J* **21**:  
827 259–267.
- 828 **Han, Y.-L. et al.** (2016). Nitrogen Use Efficiency Is Mediated by Vacuolar Nitrate  
829 Sequestration Capacity in Roots of *Brassica napus*. *Plant Physiol* **170**: 1684–1698.
- 830 **Havé, M., Marmagne, A., Chardon, F., and Masclaux-Daubresse, C.** (2017). Nitrogen  
831 remobilization during leaf senescence: lessons from *Arabidopsis* to crops. *J Exp Bot*  
832 **68**: 2513–2529.
- 833 **He, Y.-N., Peng, J.-S., Cai, Y., Liu, D.-F., Guan, Y., Yi, H.-Y., and Gong, J.-M.** (2017).  
834 Tonoplast-localized nitrate uptake transporters involved in vacuolar nitrate efflux and  
835 reallocation in *Arabidopsis*. *Sci Rep* **7**: 6417.
- 836 **Huang, Y., Drengstig, T., and Ruoff, P.** (2012). Integrating fluctuating nitrate uptake and  
837 assimilation to robust homeostasis. *Plant Cell Environ* **35**: 917–928.
- 838 **Jentsch, T.J. and Pusch, M.** (2018). CLC Chloride Channels and Transporters: Structure,  
839 Function, Physiology, and Disease. *Physiol Rev* **98**: 1493–1590.
- 840 **Jossier, M., Kroniewicz, L., Dalmas, F., Le Thiec, D., Ephritikhine, G., Thomine, S.,**  
841 **Barbier-Brygoo, H., Vavasseur, A., Filleur, S., and Leonhardt, N.** (2010). The  
842 *Arabidopsis* vacuolar anion transporter, *AtCLCc*, is involved in the regulation of  
843 stomatal movements and contributes to salt tolerance. *Plant J* **64**: 563–576.
- 844 **Kaiser, S. and Scheuring, D.** (2020). To Lead or to Follow: Contribution of the Plant  
845 Vacuole to Cell Growth. *Front Plant Sci* **11**: 553.
- 846 **Karimi, M., Inzé, D., and Depicker, A.** (2002). GATEWAY vectors for *Agrobacterium*-  
847 mediated plant transformation. *Trends Plant Sci* **7**: 193–195.
- 848 **Kim, J.Y. and Seo, H.S.** (2018). In vitro Nitrate Reductase Activity Assay from *Arabidopsis*  
849 Crude Extracts. *Bio Protoc* **8**: e2785.
- 850 **Krebs, M., Beyhl, D., Görlich, E., Al-Rasheid, K.A.S., Marten, I., Stierhof, Y.-D.,**  
851 **Hedrich, R., and Schumacher, K.** (2010). *Arabidopsis* V-ATPase activity at the  
852 tonoplast is required for efficient nutrient storage but not for sodium accumulation.  
853 *Proc Natl Acad Sci U S A* **107**: 3251–3256.
- 854 **Lawlor, D.W., Lemaire, G., and Gastal, F.** (2001). Nitrogen, Plant Growth and Crop Yield.  
855 In *Plant Nitrogen*, P.J. Lea and J.-F. Morot-Gaudry, eds (Springer: Berlin,  
856 Heidelberg), pp. 343–367.

- 857 **Li, G., Tillard, P., Gojon, A., and Maurel, C.** (2016). Dual regulation of root hydraulic  
858 conductivity and plasma membrane aquaporins by plant nitrate accumulation and  
859 high-affinity nitrate transporter NRT2.1. *Plant Cell Physiol* **57**: 733–742.
- 860 **Li, Q., Ding, G., Yang, N., White, P.J., Ye, X., Cai, H., Lu, J., Shi, L., and Xu, F.** (2020).  
861 Comparative genome and transcriptome analysis unravels key factors of nitrogen use  
862 efficiency in *Brassica napus* L. *Plant Cell Environ* **43**: 712–731.
- 863 **Liao, Q., Zhou, T., Yao, J., Han, Q., Song, H., Guan, C., Hua, Y., and Zhang, Z.** (2018).  
864 Genome-scale characterization of the vacuole nitrate transporter Chloride Channel  
865 (CLC) genes and their transcriptional responses to diverse nutrient stresses in  
866 allotetraploid rapeseed. *PLOS ONE* **13**: e0208648.
- 867 **Loudet, O., Chaillou, S., Krapp, A., and Daniel-Vedele, F.** (2003). Quantitative Trait Loci  
868 Analysis of Water and Anion Contents in Interaction With Nitrogen Availability in  
869 *Arabidopsis thaliana*. *Genetics* **163**: 711–722.
- 870 **Lv, Q., Tang, R., Liu, H., Gao, X., Li, Y., Zheng, H., and Zhang, H.** (2009). Cloning and  
871 molecular analyses of the *Arabidopsis thaliana* chloride channel gene family. *Plant*  
872 *Sci.* **176**: 650–661.
- 873 **Man, null, Abd-El Baki GK, null, Stegmann, null, Weiner, null, and Kaiser, null**  
874 (1999). The activation state of nitrate reductase is not always correlated with total  
875 nitrate reductase activity in leaves. *Planta* **209**: 462–468.
- 876 **Marmagne, A., Jasinski, S., Fagard, M., Bill, L., Guerche, P., Masclaux-Daubresse, C.,**  
877 **and Chardon, F.** (2020). Post-flowering biotic and abiotic stresses impact nitrogen  
878 use efficiency and seed filling in *Arabidopsis thaliana*. *J Exp Bot* **71**: 4578–4590.
- 879 **Martinoia, E., Heck, U., and Wiemken, A.** (1981). Vacuoles as Storage Compartments for  
880 Nitrate in Barley Leaves. *Nature* **289**: 292–294.
- 881 **McIntyre, G.I.** (1997). The role of nitrate in the osmotic and nutritional control of plant  
882 development. *Aust. J. Plant Physiol.* **24**: 103–118.
- 883 **Migge, A., Carrayol, E., Hirel, B., and Becker, T.W.** (2000). Leaf-specific overexpression  
884 of plastidic glutamine synthetase stimulates the growth of transgenic tobacco  
885 seedlings. *Planta* **210**: 252–260.
- 886 **Miller, A.J. and Smith, S.J.** (2008). Cytosolic nitrate ion homeostasis: could it have a role in  
887 sensing nitrogen status? *Ann Bot* **101**: 485–489.
- 888 **Miller, A.J. and Smith, S.J.** (1992). The mechanism of nitrate transport across the tonoplast  
889 of barley root cells. *Planta* **187**: 554–557.
- 890 **Mindell, J.A. and Maduke, M.** (2001). CIC chloride channels. *Genome Biol* **2**:  
891 REVIEWS3003.
- 892 **Miranda, K.M., Espey, M.G., and Wink, D.A.** (2001). A rapid, simple spectrophotometric  
893 method for simultaneous detection of nitrate and nitrite. *Nitric Oxide* **5**: 62–71.

- 894 **Monachello, D., Allot, M., Oliva, S., Krapp, A., Daniel-Vedele, F., Barbier-Brygoo, H.,**  
895 **and Ephritikhine, G.** (2009). Two anion transporters AtClCa and AtClCe fulfil  
896 interconnecting but not redundant roles in nitrate assimilation pathways. *New Phytol*  
897 **183**: 88–94.
- 898 **Neher, E.** (1992). Correction for liquid junction potentials in patch clamp experiments. In  
899 *Methods in Enzymology, Ion Channels.* (Academic Press), pp. 123–131.
- 900 **Nguyen, C.T., Agorio, A., Jossier, M., Depré, S., Thomine, S., and Filleur, S.** (2016).  
901 Characterization of the Chloride Channel-Like, AtCLCg, Involved in Chloride  
902 Tolerance in *Arabidopsis thaliana*. *Plant Cell Physiol* **57**: 764–775.
- 903 **Novarino, G., Weinert, S., Rickheit, G., and Jentsch, T.J.** (2010). Endosomal chloride-  
904 proton exchange rather than chloride conductance is crucial for renal endocytosis.  
905 *Science* **328**: 1398–1401.
- 906 **Oliveira, I.C., Brears, T., Knight, T.J., Clark, A., and Coruzzi, G.M.** (2002).  
907 Overexpression of cytosolic glutamine synthetase. Relation to nitrogen, light, and  
908 photorespiration. *Plant Physiol* **129**: 1170–1180.
- 909 **Park, E., Campbell, E.B., and MacKinnon, R.** (2017). Structure of a CLC chloride ion  
910 channel by cryo-electron microscopy. *Nature* **541**: 500–505.
- 911 **Poroca, D.R., Pelis, R.M., and Chappe, V.M.** (2017). ClC Channels and Transporters:  
912 Structure, Physiological Functions, and Implications in Human Chloride  
913 Channelopathies. *Front Pharmacol* **8**: 151.
- 914 **Satoh, N., Suzuki, M., Nakamura, M., Suzuki, A., Horita, S., Seki, G., and Moriya, K.**  
915 (2017). Functional coupling of V-ATPase and CLC-5. *World J Nephrol* **6**: 14–20.
- 916 **Schneider, C.A., Rasband, W.S., and Eliceiri, K.W.** (2012). NIH Image to ImageJ: 25  
917 years of image analysis. *Nat Methods* **9**: 671–675.
- 918 **Schumaker, K.S. and Sze, H.** (1987). Decrease of pH Gradients in Tonoplast Vesicles by  
919 NO<sub>3</sub> and Cl: Evidence for H-Coupled Anion Transport. *Plant Physiol* **83**: 490–496.
- 920 **Song, W.-Y., Sohn, E.J., Martinoia, E., Lee, Y.J., Yang, Y.-Y., Jasinski, M., Forestier,**  
921 **C., Hwang, I., and Lee, Y.** (2003). Engineering tolerance and accumulation of lead  
922 and cadmium in transgenic plants. *Nat Biotechnol* **21**: 914–919.
- 923 **Strahm, B.D. and Harrison, R.B.** (2006). Nitrate sorption in a variable-charge forest soil of  
924 the Pacific Northwest. *Soil Sci.* **171**: 313–321.
- 925 **Wege, S., De Angeli, A., Droillard, M.-J., Kroniewicz, L., Merlot, S., Cornu, D.,**  
926 **Gambale, F., Martinoia, E., Barbier-Brygoo, H., Thomine, S., Leonhardt, N., and**  
927 **Filleur, S.** (2014). Phosphorylation of the vacuolar anion exchanger AtClCa is  
928 required for the stomatal response to abscisic acid. *Sci Signal* **7**: ra65.
- 929 **Wege, S., Jossier, M., Filleur, S., Thomine, S., Barbier-Brygoo, H., Gambale, F., and De**  
930 **Angeli, A.** (2010). The proline 160 in the selectivity filter of the *Arabidopsis* NO<sub>3</sub>(-)

931 )/H(+) exchanger AtCLCa is essential for nitrate accumulation in planta. *Plant J* **63**:  
932 861–869.

933 **Weinert, S., Gimber, N., Deuschel, D., Stuhlmann, T., Puchkov, D., Farsi, Z., Ludwig,**  
934 **C.F., Novarino, G., López-Cayuqueo, K.I., Planells-Cases, R., and Jentsch, T.J.**  
935 **(2020). Uncoupling endosomal CLC chloride/proton exchange causes severe**  
936 **neurodegeneration. *EMBO J* **39**: e103358.**

937 **Weinert, S., Jabs, S., Supanchart, C., Schweizer, M., Gimber, N., Richter, M.,**  
938 **Rademann, J., Stauber, T., Kornak, U., and Jentsch, T.J. (2010). Lysosomal**  
939 **pathology and osteopetrosis upon loss of H<sup>+</sup>-driven lysosomal Cl<sup>-</sup> accumulation.**  
940 ***Science* **328**: 1401–1403.**

941

942

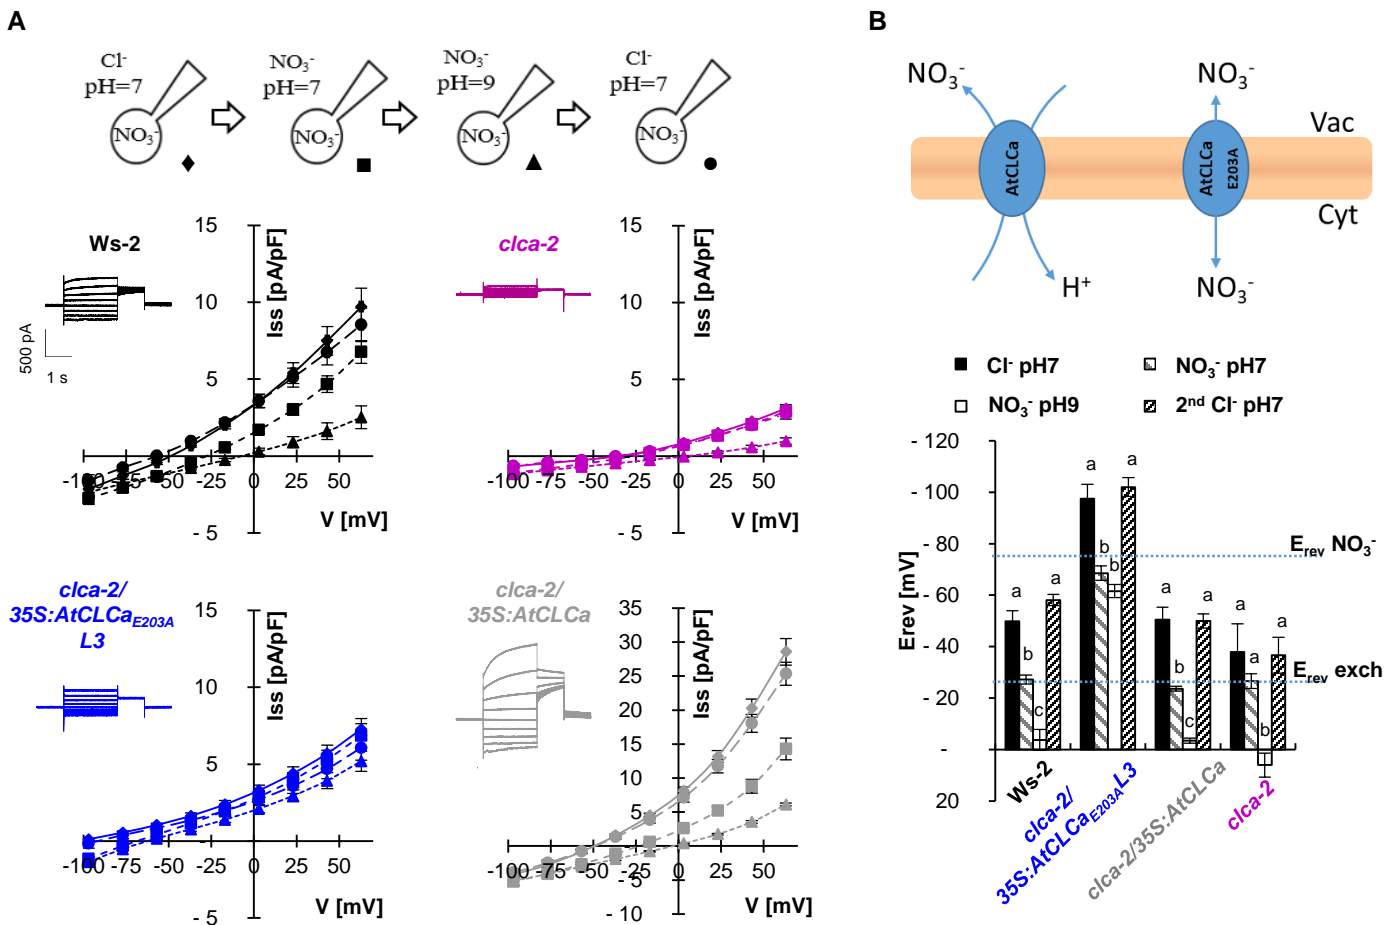

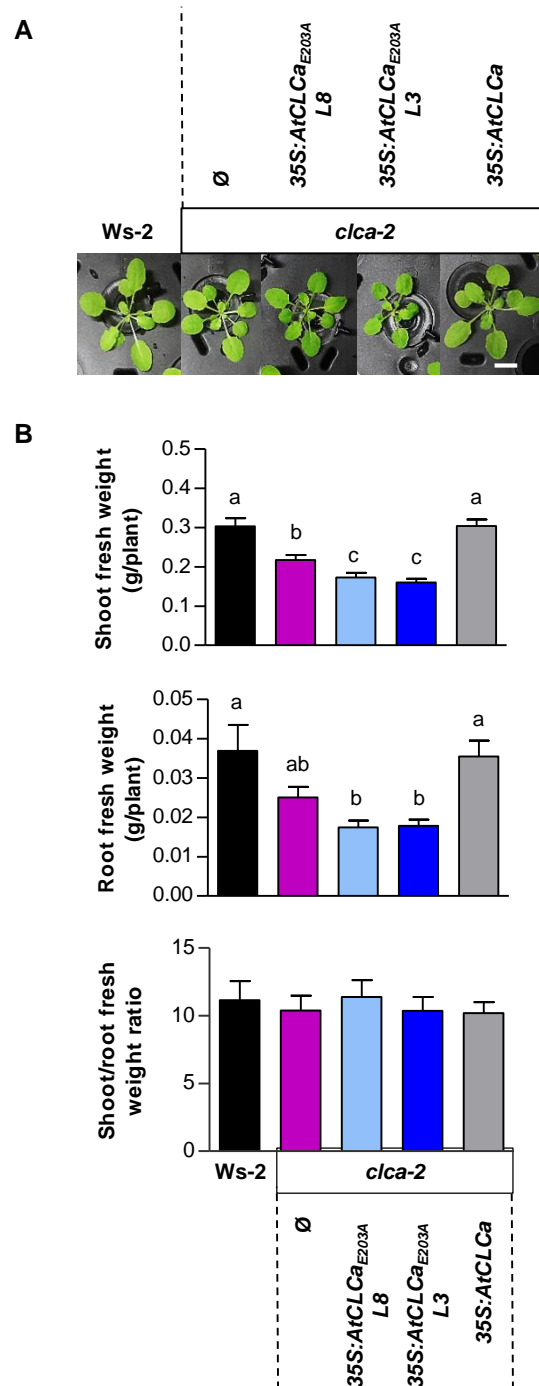

**Figure 2** *AtCLCa*<sub>E203A</sub> does not complement *clca-2* biomass production deficiency.

Plants of *Ws-2*, *clca-2*, *clca-2/35S:AtCLCa*<sub>E203A</sub> lines 8 and 3 and complemented line *clca-2/35S:AtCLCa* were grown in hydroponics on 4.25 mM NO<sub>3</sub><sup>-</sup> under short day conditions. After four weeks, photographs were taken (**A**) and after six weeks shoot and root fresh weights and the shoot/root ratio biomasses were measured (**B**). Data represent the means ± SEM of three biological replicates (3 < n < 6 per replicate). A Shapiro-Wilk normality test followed by a Welch's t-test were applied. Different letters indicate significant difference between genotypes (p < 0.05). Scale bar represents 1 cm.



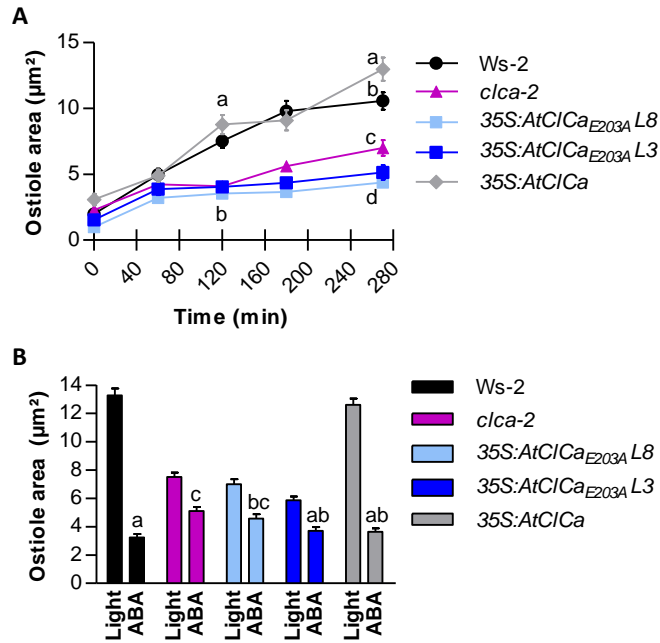

**Figure 3** *AtClCa<sub>E203A</sub>* plants are affected in stomata movements.

Kinetics of stomata opening in response to light (**A**) and effect of ABA on stomata closure (**B**). Experiments were performed on isolated epidermal peels of five weeks plants grown as in Figure 1. Epidermis were incubated in KCl buffer for 1 hour in the dark before their transfer in light for 4.5h followed by a 50  $\mu\text{M}$  ABA treatment for 3h. Data represent the means  $\pm$  SEM of three biological replicates (n=85-150 per replicate). One-way ANOVA analysis with Bonferroni comparison post-test ( $p < 0.05$ ), different letters indicate significant difference.

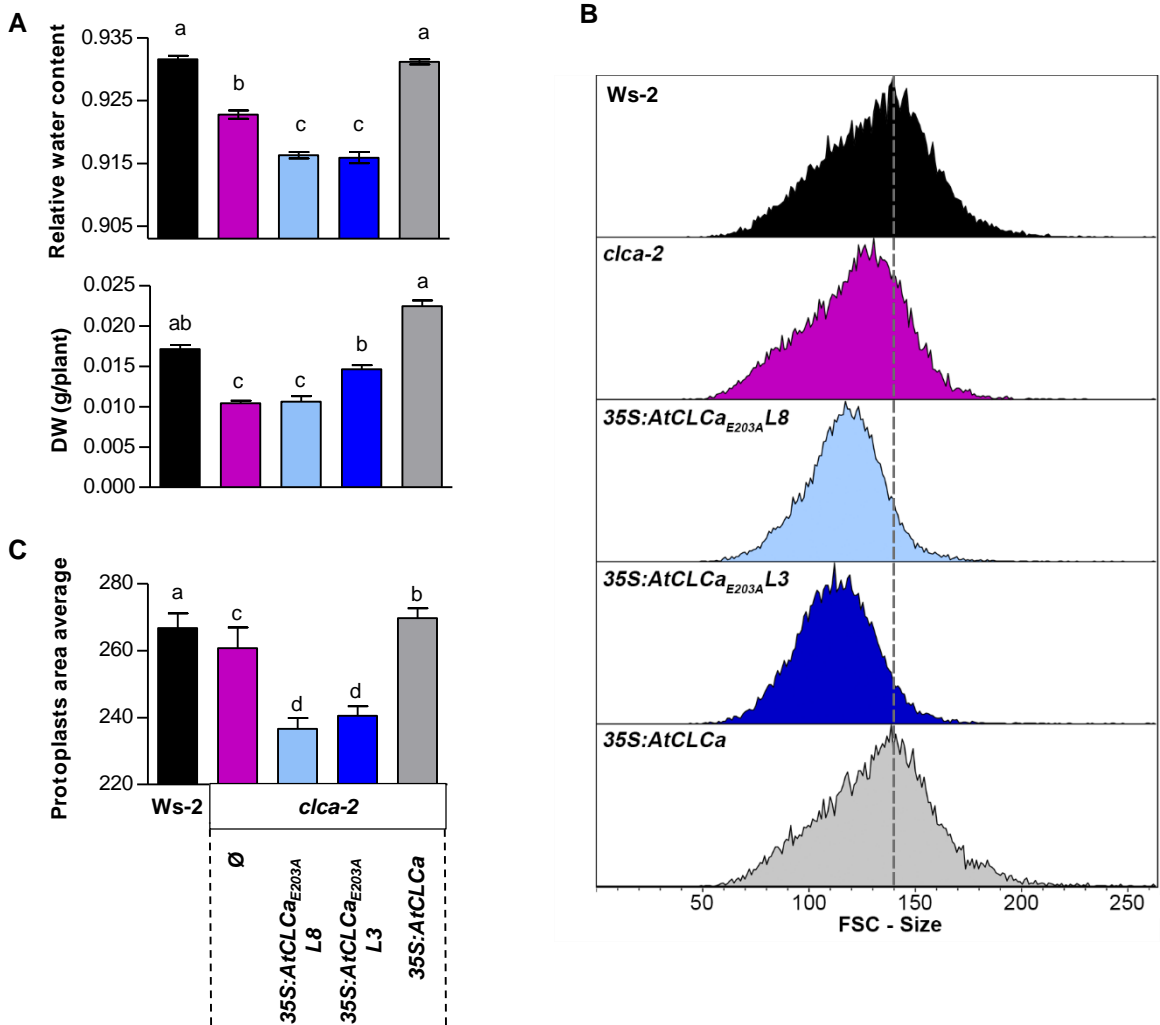

**Figure 4** *AtCLCa<sub>E203A</sub>* plants contain less water leading to impaired cell enlargement.

**(A)** Relative water content of six weeks plants, grown for five weeks on soil under short day conditions, expressing *AtCLCa<sub>E203A</sub>* under the control of the 35S promoter. Three biological replicates (25<n<30 by replicate). Statistical analysis as in Figure 3.

**(B)** Distribution of relative cell sizes determined by FACS (flow cytometry) of protoplasts generated from leaves enzymatic digestion of five weeks old plants grown as in A. The data presented are representative one experiment.

**(C)** Mean of the relative cell sizes obtained by FACS for each genotype. Two biological replicates (n=3 plants per replicate, protoplasts > 30 000). Statistical analysis are as in Figure 3.

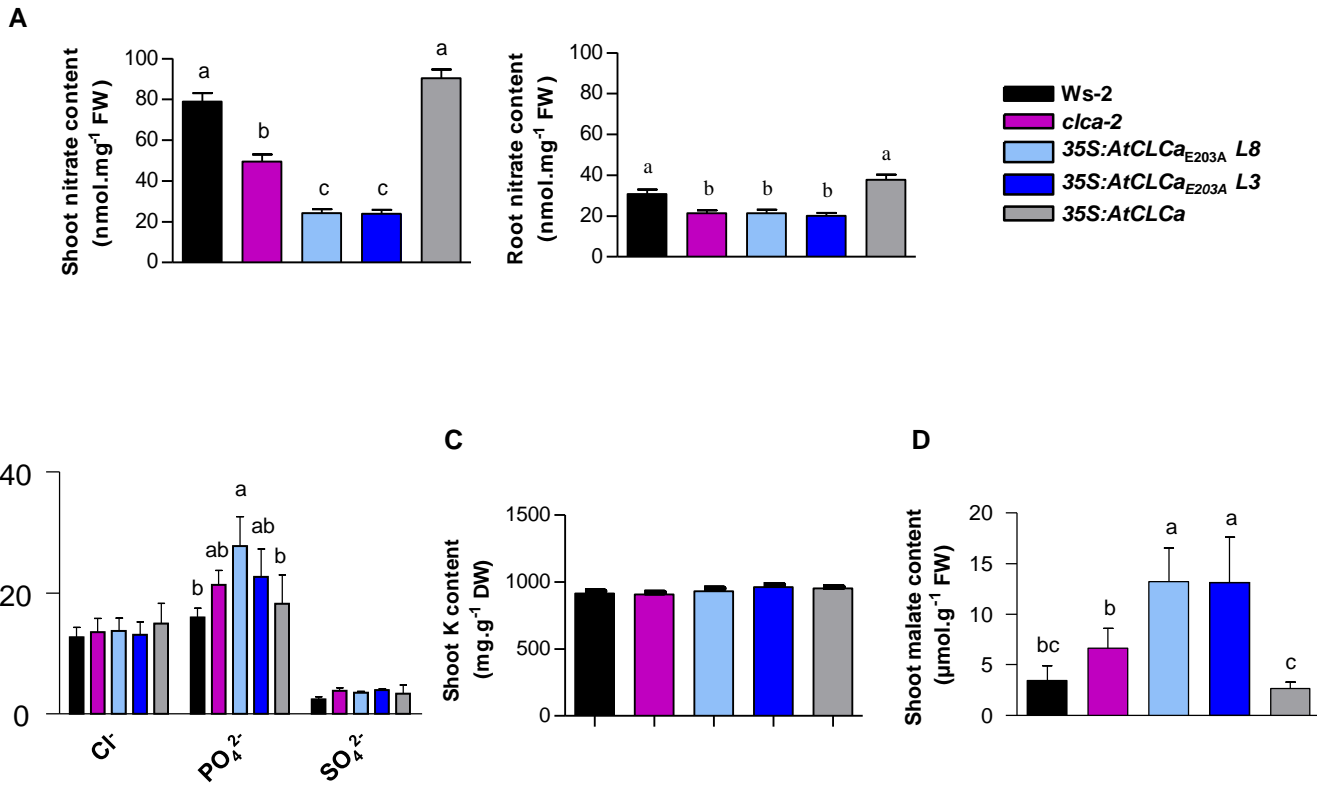

**Figure 5** *AtCLCa*<sub>E203A</sub> expression indicates a decrease of endogenous nitrate but an increase of malate concentration.

Endogenous nitrate contents **(A)** in shoot (left) and root (right), inorganic anion **(B)**, potassium **(C)** and malate **(D)** concentrations of *Ws-2*, *clca-2*, *clca-2/35S:AtCLCa*<sub>E203A</sub> and *clca-2/35S:AtCLCa* plant shoots grown in hydroponics as described in legend of Figure 2. Data represent the means ± SD of two experiments (with 2<n<9 by experiment). Statistical analysis as in Figure 3.

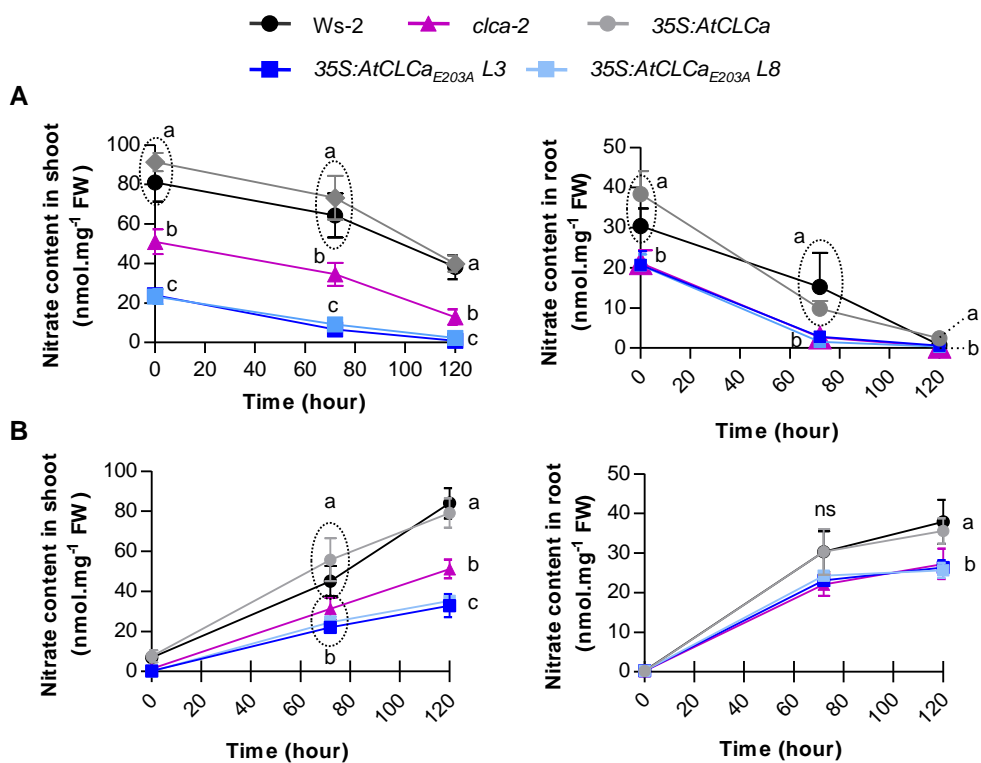

**Figure 6** *clca-2/35S:AtCLCa<sub>E203A</sub>* plants present a slower nitrate storage and no change in nitrate remobilization in response to nitrate supply in the medium compared to wild-type.

**(A)** Plants were cultivated in hydroponics for five weeks as described in Figure 2 and then nitrogen was removed from the medium for 120h. Nitrate content was determined after 0, 72h and 120h of starvation.

**(B)** Five week-old plants were submitted to ten days of nitrogen starvation, and 4.25 mM nitrate was supplied again, the content was determined after 0, 72h and 120h.

Nitrate concentration is quantified in shoots (left) and in roots (right) separately. In both experiments, data represent the means  $\pm$  SEM of three biological experiments ( $n=4-6$  plants per replicate). Statistical analysis as in Figure 3. ns: not significant.

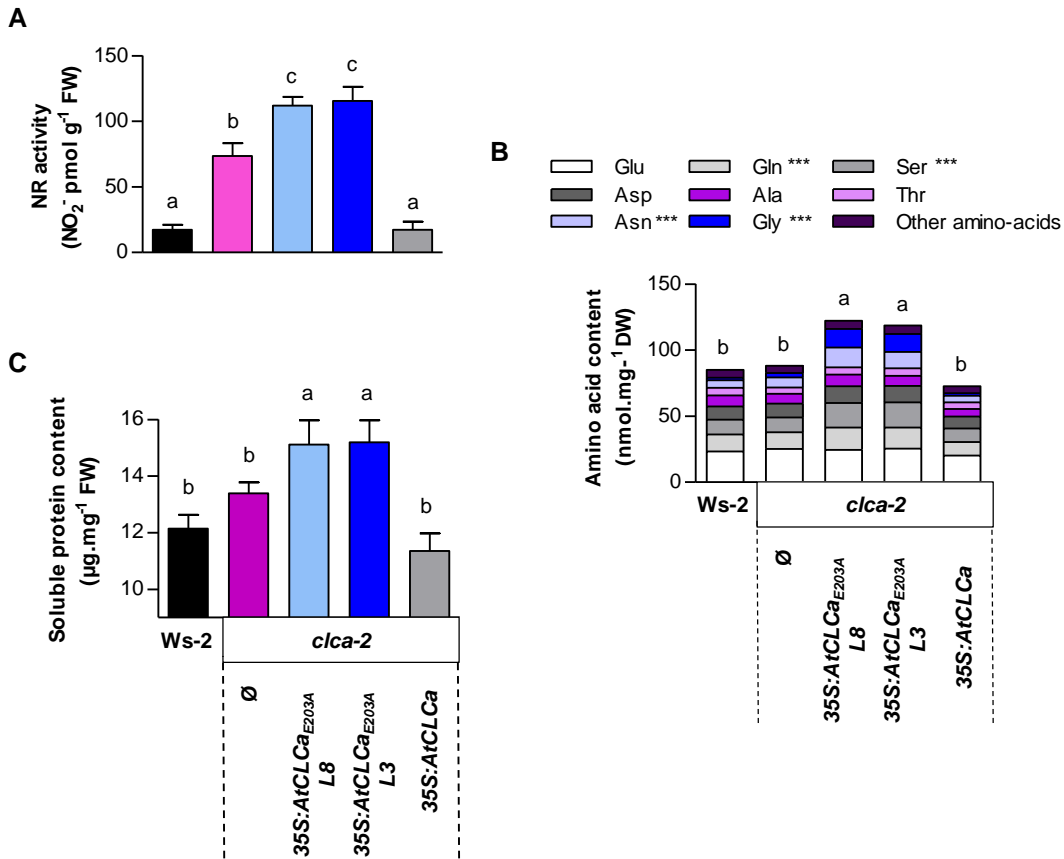

**Figure 7** *clca-2/35S:AtCLCa<sub>E203A</sub>* plants have an increased nitrate assimilation at vegetative stage.

Plants of *Ws-2*, *clca-2*, *clca-2/35S:AtCLCa<sub>E203A</sub>* line 8 and 3 and *clca-2/35S:AtCLCa* were grown as described in Fig 2 and analyzed for their nitrate reductase (NR) activity (**A**), total free amino-acids and individual amino-acids contents (**B**) and soluble protein content (**C**).

For nitrate reductase activity, the analysis was performed on four to five plants after 3 hours to light. For amino-acids content, four plants were analysed, stars represent significant differences of absolute amino acid content between *clca-2/35S:AtCLCa<sub>E203A</sub>* and *Ws-2*, *clca-2* and *clca-2/35S:AtCLCa*. For soluble protein content, three biological replicates including three plants were performed. Data represent the means  $\pm$  SD, statistical analysis is the same as in Figure 3.

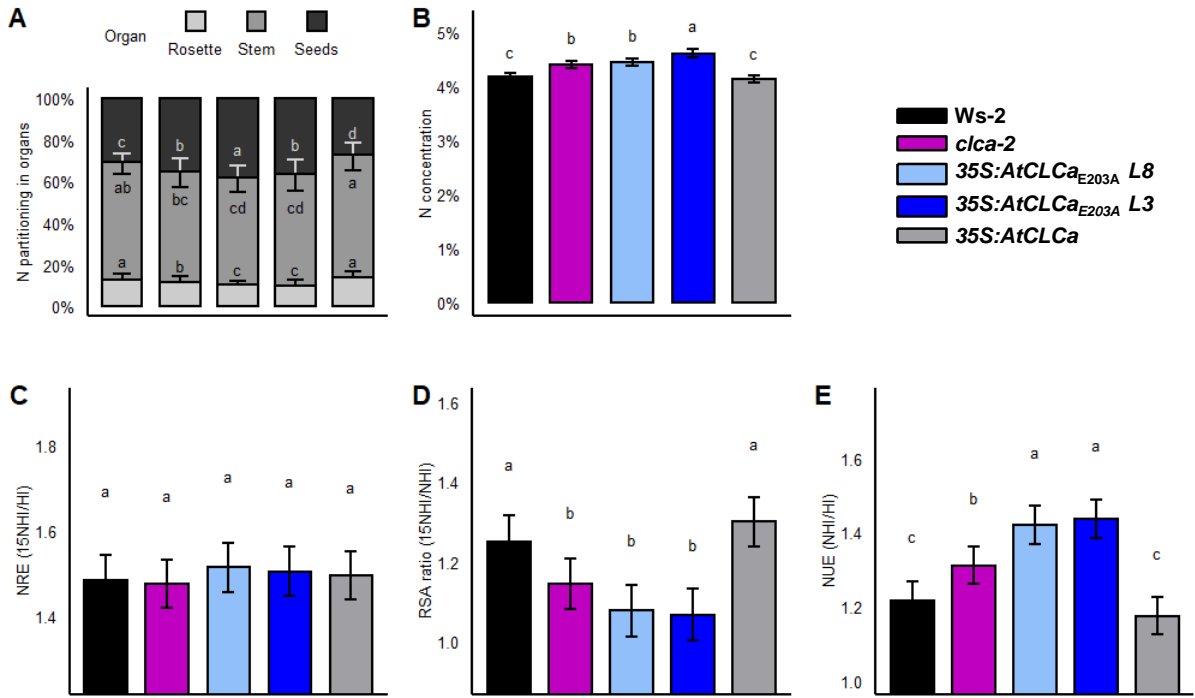

**Figure 8** The mutation in the gating glutamate in *AtCLCa* leads to an increase nitrogen use efficiency at grain-filling stage.

Plants of *Ws-2*, *clca-2*, *clca-2/35S:AtCLCa<sub>E203A</sub>* lines 8 and 3 and *clca-2/35S:AtCLCa* were grown on sand under short days and transferred under long days one week before flowering bud emergence. Plants were harvested at maturity. N partitioning in rosette, stem and seeds (**A**), seed N concentration (**B**), N remobilization efficiency (**C**), the relative specific absorption ratio (**D**) and N used efficiency (**E**). The results show for each genotype the means  $\pm$  SD. Statistical analysis was performed using analysis of variance and the means were classified using Tukey HSD test ( $P < 0.05$ ), different letters indicate significant difference.

## Parsed Citations

- Aslam, M., Rosichan, J.L., and Huffaker, R.C. (1987). Comparative Induction of Nitrate Reductase by Nitrate and Nitrite in Barley Leaves. *Plant Physiol.* 83: 579–584.  
Google Scholar: [Author Only](#) [Title Only](#) [Author and Title](#)
- Bergsdorf, E.-Y., Zdebik, A.A., and Jentsch, T.J. (2009). Residues important for nitrate/proton coupling in plant and mammalian CLC transporters. *J Biol Chem* 284: 11184–11193.  
Google Scholar: [Author Only](#) [Title Only](#) [Author and Title](#)
- Bloom, A.J. (2015). Photorespiration and nitrate assimilation: a major intersection between plant carbon and nitrogen. *Photosynth Res* 123: 117–128.  
Google Scholar: [Author Only](#) [Title Only](#) [Author and Title](#)
- Boyer, J.S. (1968). Relationship of water potential to growth of leaves. *Plant Physiol* 43: 1056–1062.  
Google Scholar: [Author Only](#) [Title Only](#) [Author and Title](#)
- Bradford, M.M. (1976). A rapid and sensitive method for the quantitation of microgram quantities of protein utilizing the principle of protein-dye binding. *Analytical Biochemistry* 72: 248–254.  
Google Scholar: [Author Only](#) [Title Only](#) [Author and Title](#)
- Brouwer, R. (1962). Nutritive influences on the distribution of dry matter in the plant. *Netherlands Journal of Agricultural Science*: 399–408.  
Google Scholar: [Author Only](#) [Title Only](#) [Author and Title](#)
- Cardenas-Navarro, R., Adamowicz, S., and Robin, P. (1999). Nitrate accumulation in plants: a role for water. *J. Exp. Bot.* 50: 613–624.  
Google Scholar: [Author Only](#) [Title Only](#) [Author and Title](#)
- Castaigns, L., Camargo, A., Pocholle, D., Gaudon, V., Texier, Y., Boutet-Mercey, S., Taconnat, L., Renou, J.-P., Daniel-Vedele, F., Fernandez, E., Meyer, C., and Krapp, A. (2009). The nodule inception-like protein 7 modulates nitrate sensing and metabolism in *Arabidopsis*. *Plant J* 57: 426–435.  
Google Scholar: [Author Only](#) [Title Only](#) [Author and Title](#)
- Chardon, F., Barthélémy, J., Daniel-Vedele, F., and Masclaux-Daubresse, C. (2010). Natural variation of nitrate uptake and nitrogen use efficiency in *Arabidopsis thaliana* cultivated with limiting and ample nitrogen supply. *J Exp Bot* 61: 2293–2302.  
Google Scholar: [Author Only](#) [Title Only](#) [Author and Title](#)
- Chardon, F., Noël, V., and Masclaux-Daubresse, C. (2012). Exploring NUE in crops and in *Arabidopsis* ideotypes to improve yield and seed quality. *J Exp Bot* 63: 3401–3412.  
Google Scholar: [Author Only](#) [Title Only](#) [Author and Title](#)
- Chen, B.M., Wang, Z.H., Li, S.X., Wang, G.X., Song, H.X., and Xi-Na, W. (2004). Effects of nitrate supply on plant growth, nitrate accumulation, metabolic nitrate concentration and nitrate reductase activity in three leafy vegetables. *Plant Sci.* 167: 635–643.  
Google Scholar: [Author Only](#) [Title Only](#) [Author and Title](#)
- Clough, S.J. and Bent, A.F. (1998). Floral dip: a simplified method for *Agrobacterium*-mediated transformation of *Arabidopsis thaliana*. *Plant J* 16: 735–743.  
Google Scholar: [Author Only](#) [Title Only](#) [Author and Title](#)
- Cookson, S.J., Williams, L.E., and Miller, A.J. (2005). Light-dark changes in cytosolic nitrate pools depend on nitrate reductase activity in *Arabidopsis* leaf cells. *Plant Physiol* 138: 1097–1105.  
Google Scholar: [Author Only](#) [Title Only](#) [Author and Title](#)
- Costa, A., Gutla, P.V.K., Boccaccio, A., Scholz-Starke, J., Festa, M., Basso, B., Zanardi, I., Pusch, M., Schiavo, F.L., Gambale, F., and Carpaneto, A. (2012). The *Arabidopsis* central vacuole as an expression system for intracellular transporters: functional characterization of the Cl<sup>-</sup>/H<sup>+</sup> exchanger CLC-7. *J Physiol* 590: 3421–3430.  
Google Scholar: [Author Only](#) [Title Only](#) [Author and Title](#)
- Crawford, N.M. (1995). Nitrate: nutrient and signal for plant growth. *Plant Cell* 7: 859–868.  
Google Scholar: [Author Only](#) [Title Only](#) [Author and Title](#)
- Curtis, M.D. and Grossniklaus, U. (2003). A gateway cloning vector set for high-throughput functional analysis of genes in planta. *Plant Physiol* 133: 462–469.  
Google Scholar: [Author Only](#) [Title Only](#) [Author and Title](#)
- David, L.C., Dechorgnat, J., Berquin, P., Routaboul, J.M., Debeaujon, I., Daniel-Vedele, F., and Ferrario-Méry, S. (2014). Proanthocyanidin oxidation of *Arabidopsis* seeds is altered in mutant of the high-affinity nitrate transporter NRT2.7. *J Exp Bot* 65: 885–893.  
Google Scholar: [Author Only](#) [Title Only](#) [Author and Title](#)

**De Angeli, A., Monachello, D., Ephritikhine, G., Frachisse, J.M., Thomine, S., Gambale, F., and Barbier-Brygoo, H. (2006). The nitrate/proton antiporter AtCLCa mediates nitrate accumulation in plant vacuoles. *Nature* 442: 939–942.**

Google Scholar: [Author Only](#) [Title Only](#) [Author and Title](#)

**Dechorgnat, J., Nguyen, C.T., Armengaud, P., Jossier, M., Diatloff, E., Filleur, S., and Daniel-Vedele, F. (2011). From the soil to the seeds: the long journey of nitrate in plants. *J Exp Bot* 62: 1349–1359.**

Google Scholar: [Author Only](#) [Title Only](#) [Author and Title](#)

**Demes, E., Besse, L., Cubero-Font, P., Satiat-Jeuemaitre, B., Thomine, S., and De Angeli, A. (2020). Dynamic measurement of cytosolic pH and [NO<sub>3</sub><sup>-</sup>] uncovers the role of the vacuolar transporter AtCLCa in cytosolic pH homeostasis. *Proc Natl Acad Sci U S A* 117: 15343–15353.**

Google Scholar: [Author Only](#) [Title Only](#) [Author and Title](#)

**Dünser, K., Gupta, S., Herger, A., Feraru, M.I., Ringli, C., and Kleine-Vehn, J. (2019). Extracellular matrix sensing by FERONIA and Leucine-Rich Repeat Extensins controls vacuolar expansion during cellular elongation in *Arabidopsis thaliana*. *EMBO J* 38: e100353.**

Google Scholar: [Author Only](#) [Title Only](#) [Author and Title](#)

**Dutzler, R., Campbell, E.B., Cadene, M., Chait, B.T., and MacKinnon, R. (2002). X-ray structure of a CIC chloride channel at 3.0 Å reveals the molecular basis of anion selectivity. *Nature* 415: 287–294.**

Google Scholar: [Author Only](#) [Title Only](#) [Author and Title](#)

**Dutzler, R., Campbell, E.B., and MacKinnon, R. (2003). Gating the selectivity filter in CIC chloride channels. *Science* 300: 108–112.**

Google Scholar: [Author Only](#) [Title Only](#) [Author and Title](#)

**Eisenhut, M., Roell, M.-S., and Weber, A.P.M. (2019). Mechanistic understanding of photorespiration paves the way to a new green revolution. *New Phytol* 223: 1762–1769.**

Google Scholar: [Author Only](#) [Title Only](#) [Author and Title](#)

**von der Fecht-Bartenbach, J., Bogner, M., Dynowski, M., and Ludewig, U. (2010). CLC-b-mediated NO<sub>3</sub><sup>-</sup>/H<sup>+</sup> exchange across the tonoplast of *Arabidopsis* vacuoles. *Plant Cell Physiol* 51: 960–968.**

Google Scholar: [Author Only](#) [Title Only](#) [Author and Title](#)

**Feng, H., Fan, X., Miller, A.J., and Xu, G. (2020). Plant nitrogen uptake and assimilation: regulation of cellular pH homeostasis. *J Exp Bot* 71: 4380–4392.**

Google Scholar: [Author Only](#) [Title Only](#) [Author and Title](#)

**Filleur, S. and Daniel-Vedele, F. (1999). Expression analysis of a high-affinity nitrate transporter isolated from *Arabidopsis thaliana* by differential display. *Planta* 207: 461–469.**

Google Scholar: [Author Only](#) [Title Only](#) [Author and Title](#)

**Geelen, D., Lurin, C., Bouchez, D., Frachisse, J.M., Lelièvre, F., Courtial, B., Barbier-Brygoo, H., and Maurel, C. (2000). Disruption of putative anion channel gene AtCLC-a in *Arabidopsis* suggests a role in the regulation of nitrate content. *Plant J* 21: 259–267.**

Google Scholar: [Author Only](#) [Title Only](#) [Author and Title](#)

**Han, Y.-L. et al. (2016). Nitrogen Use Efficiency Is Mediated by Vacuolar Nitrate Sequestration Capacity in Roots of *Brassica napus*. *Plant Physiol* 170: 1684–1698.**

Google Scholar: [Author Only](#) [Title Only](#) [Author and Title](#)

**Havé, M., Marmagne, A., Chardon, F., and Masclaux-Daubresse, C. (2017). Nitrogen remobilization during leaf senescence: lessons from *Arabidopsis* to crops. *J Exp Bot* 68: 2513–2529.**

Google Scholar: [Author Only](#) [Title Only](#) [Author and Title](#)

**He, Y.-N., Peng, J.-S., Cai, Y., Liu, D.-F., Guan, Y., Yi, H.-Y., and Gong, J.-M. (2017). Tonoplast-localized nitrate uptake transporters involved in vacuolar nitrate efflux and reallocation in *Arabidopsis*. *Sci Rep* 7: 6417.**

Google Scholar: [Author Only](#) [Title Only](#) [Author and Title](#)

**Huang, Y., Drengstig, T., and Ruoff, P. (2012). Integrating fluctuating nitrate uptake and assimilation to robust homeostasis. *Plant Cell Environ* 35: 917–928.**

Google Scholar: [Author Only](#) [Title Only](#) [Author and Title](#)

**Jentsch, T.J. and Pusch, M. (2018). CLC Chloride Channels and Transporters: Structure, Function, Physiology, and Disease. *Physiol Rev* 98: 1493–1590.**

Google Scholar: [Author Only](#) [Title Only](#) [Author and Title](#)

**Jossier, M., Kroniewicz, L., Dalmás, F., Le Thiec, D., Ephritikhine, G., Thomine, S., Barbier-Brygoo, H., Vavasseur, A., Filleur, S., and Leonhardt, N. (2010). The *Arabidopsis* vacuolar anion transporter, AtCLCc, is involved in the regulation of stomatal movements and contributes to salt tolerance. *Plant J* 64: 563–576.**

Google Scholar: [Author Only](#) [Title Only](#) [Author and Title](#)



**Kaiser, S. and Scheuring, D. (2020). To Lead or to Follow: Contribution of the Plant Vacuole to Cell Growth. *Front Plant Sci* 11: 553.**

Google Scholar: [Author Only](#) [Title Only](#) [Author and Title](#)

**Karimi, M., Inzé, D., and Depicker, A. (2002). GATEWAY vectors for Agrobacterium-mediated plant transformation. *Trends Plant Sci* 7: 193–195.**

Google Scholar: [Author Only](#) [Title Only](#) [Author and Title](#)

**Kim, J.Y. and Seo, H.S. (2018). In vitro Nitrate Reductase Activity Assay from Arabidopsis Crude Extracts. *Bio Protoc* 8: e2785.**

Google Scholar: [Author Only](#) [Title Only](#) [Author and Title](#)

**Krebs, M., Beyhl, D., Görlich, E., Al-Rasheid, K.A.S., Marten, I., Stierhof, Y.-D., Hedrich, R., and Schumacher, K. (2010). Arabidopsis V-ATPase activity at the tonoplast is required for efficient nutrient storage but not for sodium accumulation. *Proc Natl Acad Sci U S A* 107: 3251–3256.**

Google Scholar: [Author Only](#) [Title Only](#) [Author and Title](#)

**Lawlor, D.W., Lemaire, G., and Gastal, F. (2001). Nitrogen, Plant Growth and Crop Yield. In *Plant Nitrogen*, P.J. Lea and J.-F. Morot-Gaudry, eds (Springer: Berlin, Heidelberg), pp. 343–367.**

Google Scholar: [Author Only](#) [Title Only](#) [Author and Title](#)

**Li, G., Tillard, P., Gojon, A., and Maurel, C. (2016). Dual regulation of root hydraulic conductivity and plasma membrane aquaporins by plant nitrate accumulation and high-affinity nitrate transporter NRT2.1. *Plant Cell Physiol* 57: 733–742.**

Google Scholar: [Author Only](#) [Title Only](#) [Author and Title](#)

**Li, Q., Ding, G., Yang, N., White, P.J., Ye, X., Cai, H., Lu, J., Shi, L., and Xu, F. (2020). Comparative genome and transcriptome analysis unravels key factors of nitrogen use efficiency in *Brassica napus* L. *Plant Cell Environ* 43: 712–731.**

Google Scholar: [Author Only](#) [Title Only](#) [Author and Title](#)

**Liao, Q., Zhou, T., Yao, J., Han, Q., Song, H., Guan, C., Hua, Y., and Zhang, Z. (2018). Genome-scale characterization of the vacuole nitrate transporter Chloride Channel (CLC) genes and their transcriptional responses to diverse nutrient stresses in allotetraploid rapeseed. *PLOS ONE* 13: e0208648.**

Google Scholar: [Author Only](#) [Title Only](#) [Author and Title](#)

**Loudet, O., Chaillou, S., Krapp, A., and Daniel-Vedele, F. (2003). Quantitative Trait Loci Analysis of Water and Anion Contents in Interaction With Nitrogen Availability in *Arabidopsis thaliana*. *Genetics* 163: 711–722.**

Google Scholar: [Author Only](#) [Title Only](#) [Author and Title](#)

**Lv, Q., Tang, R., Liu, H., Gao, X., Li, Y., Zheng, H., and Zhang, H. (2009). Cloning and molecular analyses of the *Arabidopsis thaliana* chloride channel gene family. *Plant Sci*. 176: 650–661.**

Google Scholar: [Author Only](#) [Title Only](#) [Author and Title](#)

**Man, null, Abd-El Baki GK, null, Stegmann, null, Weiner, null, and Kaiser, null (1999). The activation state of nitrate reductase is not always correlated with total nitrate reductase activity in leaves. *Planta* 209: 462–468.**

Google Scholar: [Author Only](#) [Title Only](#) [Author and Title](#)

**Marmagne, A., Jasinski, S., Fagard, M., Bill, L., Guerche, P., Masclaux-Daubresse, C., and Chardon, F. (2020). Post-flowering biotic and abiotic stresses impact nitrogen use efficiency and seed filling in *Arabidopsis thaliana*. *J Exp Bot* 71: 4578–4590.**

Google Scholar: [Author Only](#) [Title Only](#) [Author and Title](#)

**Martinoia, E., Heck, U., and Wiemken, A. (1981). Vacuoles as Storage Compartments for Nitrate in Barley Leaves. *Nature* 289: 292–294.**

Google Scholar: [Author Only](#) [Title Only](#) [Author and Title](#)

**McIntyre, G.I. (1997). The role of nitrate in the osmotic and nutritional control of plant development. *Aust. J. Plant Physiol.* 24: 103–118.**

Google Scholar: [Author Only](#) [Title Only](#) [Author and Title](#)

**Migge, A., Carrayol, E., Hirel, B., and Becker, T.W. (2000). Leaf-specific overexpression of plastidic glutamine synthetase stimulates the growth of transgenic tobacco seedlings. *Planta* 210: 252–260.**

Google Scholar: [Author Only](#) [Title Only](#) [Author and Title](#)

**Miller, A.J. and Smith, S.J. (2008). Cytosolic nitrate ion homeostasis: could it have a role in sensing nitrogen status? *Ann Bot* 101: 485–489.**

Google Scholar: [Author Only](#) [Title Only](#) [Author and Title](#)

**Miller, A.J. and Smith, S.J. (1992). The mechanism of nitrate transport across the tonoplast of barley root cells. *Planta* 187: 554–557.**

Google Scholar: [Author Only](#) [Title Only](#) [Author and Title](#)

**Mindell, J.A. and Maduke, M. (2001). CIC chloride channels. *Genome Biol* 2: REVIEWS3003.**

Google Scholar: [Author Only](#) [Title Only](#) [Author and Title](#)

**Miranda, K.M., Espey, M.G., and Wink, D.A. (2001). A rapid, simple spectrophotometric method for simultaneous detection of nitrate and nitrite. *Nitric Oxide* 5: 62–71.**

Google Scholar: [Author Only](#) [Title Only](#) [Author and Title](#)

**Monachello, D., Allot, M., Oliva, S., Krapp, A., Daniel-Vedele, F., Barbier-Brygoo, H., and Ephritikhine, G. (2009). Two anion transporters AtCICa and AtCICe fulfil interconnecting but not redundant roles in nitrate assimilation pathways. *New Phytol* 183: 88–94.**

Google Scholar: [Author Only](#) [Title Only](#) [Author and Title](#)

**Neher, E. (1992). Correction for liquid junction potentials in patch clamp experiments. In *Methods in Enzymology, Ion Channels*. (Academic Press), pp. 123–131.**

Google Scholar: [Author Only](#) [Title Only](#) [Author and Title](#)

**Nguyen, C.T., Agorio, A., Jossier, M., Depré, S., Thomine, S., and Filleur, S. (2016). Characterization of the Chloride Channel-Like, AtCLCg, Involved in Chloride Tolerance in *Arabidopsis thaliana*. *Plant Cell Physiol* 57: 764–775.**

Google Scholar: [Author Only](#) [Title Only](#) [Author and Title](#)

**Novarino, G., Weinert, S., Rickheit, G., and Jentsch, T.J. (2010). Endosomal chloride-proton exchange rather than chloride conductance is crucial for renal endocytosis. *Science* 328: 1398–1401.**

Google Scholar: [Author Only](#) [Title Only](#) [Author and Title](#)

**Oliveira, I.C., Brears, T., Knight, T.J., Clark, A., and Coruzzi, G.M. (2002). Overexpression of cytosolic glutamine synthetase. Relation to nitrogen, light, and photorespiration. *Plant Physiol* 129: 1170–1180.**

Google Scholar: [Author Only](#) [Title Only](#) [Author and Title](#)

**Park, E., Campbell, E.B., and MacKinnon, R. (2017). Structure of a CLC chloride ion channel by cryo-electron microscopy. *Nature* 541: 500–505.**

Google Scholar: [Author Only](#) [Title Only](#) [Author and Title](#)

**Poroca, D.R., Pelis, R.M., and Chappe, V.M. (2017). CIC Channels and Transporters: Structure, Physiological Functions, and Implications in Human Chloride Channelopathies. *Front Pharmacol* 8: 151.**

Google Scholar: [Author Only](#) [Title Only](#) [Author and Title](#)

**Satoh, N., Suzuki, M., Nakamura, M., Suzuki, A., Horita, S., Seki, G., and Moriya, K. (2017). Functional coupling of V-ATPase and CLC-5. *World J Nephrol* 6: 14–20.**

Google Scholar: [Author Only](#) [Title Only](#) [Author and Title](#)

**Schneider, C.A., Rasband, W.S., and Eliceiri, K.W. (2012). NIH Image to ImageJ: 25 years of image analysis. *Nat Methods* 9: 671–675.**

Google Scholar: [Author Only](#) [Title Only](#) [Author and Title](#)

**Schumaker, K.S. and Sze, H. (1987). Decrease of pH Gradients in Tonoplast Vesicles by NO<sub>3</sub> and Cl: Evidence for H-Coupled Anion Transport. *Plant Physiol* 83: 490–496.**

Google Scholar: [Author Only](#) [Title Only](#) [Author and Title](#)

**Song, W.-Y., Sohn, E.J., Martinoia, E., Lee, Y.J., Yang, Y.-Y., Jasinski, M., Forestier, C., Hwang, I., and Lee, Y. (2003). Engineering tolerance and accumulation of lead and cadmium in transgenic plants. *Nat Biotechnol* 21: 914–919.**

Google Scholar: [Author Only](#) [Title Only](#) [Author and Title](#)

**Strahm, B.D. and Harrison, R.B. (2006). Nitrate sorption in a variable-charge forest soil of the Pacific Northwest. *Soil Sci.* 171: 313–321.**

Google Scholar: [Author Only](#) [Title Only](#) [Author and Title](#)

**Wege, S., De Angeli, A., Droillard, M.-J., Kroniewicz, L., Merlot, S., Cornu, D., Gambale, F., Martinoia, E., Barbier-Brygoo, H., Thomine, S., Leonhardt, N., and Filleur, S. (2014). Phosphorylation of the vacuolar anion exchanger AtCLCa is required for the stomatal response to abscisic acid. *Sci Signal* 7: ra65.**

Google Scholar: [Author Only](#) [Title Only](#) [Author and Title](#)

**Wege, S., Jossier, M., Filleur, S., Thomine, S., Barbier-Brygoo, H., Gambale, F., and De Angeli, A. (2010). The proline 160 in the selectivity filter of the *Arabidopsis* NO<sub>3</sub><sup>(-)</sup>/H<sup>(+)</sup> exchanger AtCLCa is essential for nitrate accumulation in planta. *Plant J* 63: 861–869.**

Google Scholar: [Author Only](#) [Title Only](#) [Author and Title](#)

**Weinert, S., Gimber, N., Deuschel, D., Stuhlmann, T., Puchkov, D., Farsi, Z., Ludwig, C.F., Novarino, G., López-Cayuqueo, K.I., Planells-Cases, R., and Jentsch, T.J. (2020). Uncoupling endosomal CLC chloride/proton exchange causes severe neurodegeneration. *EMBO J* 39: e103358.**

Google Scholar: [Author Only](#) [Title Only](#) [Author and Title](#)

**Weinert, S., Jabs, S., Supanchart, C., Schweizer, M., Gimber, N., Richter, M., Rademann, J., Stauber, T., Kornak, U., and Jentsch,**

**T.J. (2010). Lysosomal pathology and osteopetrosis upon loss of H<sup>+</sup>-driven lysosomal Cl<sup>-</sup> accumulation. Science 328: 1401–1403.**

Google Scholar: [Author Only](#) [Title Only](#) [Author and Title](#)
